# Supplementary material
Source: ML conference proceedings conference paper supplement (https://openreview.net/forum?id=SVjDiiVySh)
Supplement: supplementary_material [file attachment]

# Appendices

We provide additional experiment details, results and analysis in the supplementary material.

## A. Dataset Details

### A.1 Pre-training Datasets

We utilized four image-text pre-training datasets of varying scales, namely CC3M [25], CC12M [2], RedCaps [8], and LAION-400M [23], to train both CLIP and LaCLIP models. Additionally, we trained SLIP and LaSLIP models on the CC12M dataset. It is important to note that due to image link rot within the datasets, the versions we obtained may have slightly fewer images compared to the original versions. As a result, there may be slight performance differences when compared to models trained on the full image versions. Below are detailed descriptions of the four pre-training datasets:

**CC3M [25]:** This dataset comprises 3.3 million image-text pairs extracted from 5 billion webpages. The image descriptions are derived from the HTML alt-text attribute. The version we used consists of 2.8 million unique samples.

**CC12M [2]:** With a similar procedure as CC3M, CC12M consists of 12.4 million image-text pairs. The filters used in this dataset are more relaxed, resulting in a wider range of topics and visual concepts, making it more reflective of real-world scenarios. The version we acquired contains 10.0 million samples.

**RedCaps [7]:** RedCaps encompasses 12.0 million image-caption pairs gathered exclusively from Reddit across 350 subreddits. The captions are sourced from Reddit instead of HTML alt-text. The version we acquired includes 11.7 million unique samples.

**LAION-400M [23]:** This dataset is constructed by processing and filtering the Common Crawl dataset. The original version contains 413 million unique samples, while the version we obtained consists of 340 million samples.

For all datasets, we resized the images such that the shorter side measured 256 pixels.

### A.2 Downstream Datasets

We conducted evaluations on our pre-trained model using both ImageNet [6] and 15 widely-used downstream datasets. To prepare the downstream datasets, we utilized torchvision and VISSL [13]. The detailed information about the downstream datasets can be found in Table A1.

## B. Implementation Details

**Encoders** We employed the standard ViT-S/16, ViT-B/16, ViT-B/32 and ViT-L/16 architectures from [9, 29] as our vision encoders. Specifically, ViT-B/16 is used on all CC3M, CC12M and RedCaps datasets. ViT-B/32 is used on LAION-400M. ViT-S/16 and ViT-L/16 are used on CC12M. Following the approach in SLIP [19], we utilized the smallest text encoder from CLIP [22]. Our tokenizer was consistent with CLIP, having a vocabulary size of 49,408 and a maximum context length of 77. Further details about the encoders can be found in Table A2.

**Hyper-Parameters** Table A3 provides an overview of the pre-training hyperparameters used for CLIP on all datasets. Following [22, 19], we perform RandomResizedCrop augmentation for the images. For SLIP training, the learning rate was set to  $3 \times 10^{-3}$ , weight decay was set to 0.1, and all other parameters remained the same. Further details can be found in Table A4. The pre-training process was conducted on four machines with eight A100 GPUs each.

**Zero-shot Classification** We follow a similar prompt ensemble strategy as described in [22] and employ the same set of prompting templates. For each class name, we compute the average text embedding across all templates. These averaged embeddings are then used to calculate the similarity between each test image and the class embeddings. Specifically, for zero-shot evaluation on ImageNet, models trained on the LAION-400M dataset use the exact 80 prompts provided by [22] to ensure a

Table A1: Details of the downstream classification datasets.

| Dataset             | Metric         | Categories | Train Size | Test Size |
|---------------------|----------------|------------|------------|-----------|
| Food-101 [1]        | Accuracy       | 101        | 75,750     | 25,250    |
| CIFAR-10 [16]       | Accuracy       | 10         | 50,000     | 10,000    |
| CIFAR-100 [16]      | Accuracy       | 100        | 50,000     | 10,000    |
| SUN397 [32]         | Accuracy       | 397        | 19,850     | 19,850    |
| Stanford Cars [15]  | Accuracy       | 196        | 8,144      | 8,041     |
| FGVC Aircraft [18]  | Mean per class | 100        | 6,667      | 3,333     |
| DTD [4]             | Accuracy       | 47         | 3,760      | 1,880     |
| Oxford Pets [21]    | Mean per class | 37         | 3,680      | 3,669     |
| Caltech-101 [11]    | Mean per class | 102        | 3,060      | 6,085     |
| Oxford Flowers [20] | Mean per class | 102        | 2,040      | 6,149     |
| STL-10 [5]          | Accuracy       | 10         | 1,000      | 8,000     |
| EuroSAT [14]        | Accuracy       | 10         | 10,000     | 5,000     |
| RESISC45 [3]        | Accuracy       | 45         | 25,200     | 6,300     |
| GTSRB [27]          | Accuracy       | 43         | 26,640     | 12,630    |
| Country211 [22, 28] | Accuracy       | 211        | 42,200     | 21,100    |

Table A2: Encoder details.

| Model    | Patch size | Input resolution | Embedding dimension | Vision Transformer |       |       | Text Transformer |       |       | Vocab size | Text length |
|----------|------------|------------------|---------------------|--------------------|-------|-------|------------------|-------|-------|------------|-------------|
|          |            |                  |                     | Layers             | Width | Heads | Layers           | Width | Heads |            |             |
| ViT-S/16 | 16         | 224              | 512                 | 12                 | 384   | 12    | 12               | 512   | 8     | 49,408     | 77          |
| ViT-B/16 | 16         | 224              | 512                 | 12                 | 768   | 12    | 12               | 512   | 8     |            |             |
| ViT-B/32 | 32         | 224              | 512                 | 12                 | 768   | 12    | 12               | 512   | 8     |            |             |
| ViT-L/16 | 16         | 224              | 512                 | 24                 | 1024  | 16    | 12               | 512   | 8     |            |             |

fair comparison. For models trained on other datasets, we use a subset of 7 templates recommended by [22] to expedite the evaluation process.

**Few-shot Classification** Following the settings in [10], we evaluate the 5-way 5-shot performance across 15 downstream datasets. We use Prototypical Networks [26] as classifier on top of the features extracted from vision encoders without data augmentation. Only Resize followed by CenterCrop is applied here for all images. We evaluate each model for 600 randomly sampled episodes, and for each episode, images are sampled from the combination of training, validation and testing sets. We always sample 15 images for each class as query set. The mean accuracy across all episodes are reported in the main paper, and we also report the 95% confidence interval in the appendix.

**Linear-Probing** For linear probing on ImageNet, we keep the image encoder frozen and train a Linear Classifier on the extracted features. The only augmentation applied is RandomHorizontalFlip. We sweep the base learning rate across the range of [0.002, 0.005, 0.01, 0.015, 0.02, 0.03, 0.05] and report the best performance achieved. The learning rate is scaled linearly based on the actual batch size, following the approach outlined in [12]. Details of all other hyperparameters can be found in Table A5. For linear probing on all other downstream datasets, we train a logistic regression layer on top of the frozen features extracted from the vision encoders, without applying any data augmentation. The model is optimized using L-BFGS with Scikit-learn, and the maximum number of iterations is set to 500. To determine the optimal  $\ell_2$  regularization term for each model and dataset, we perform a sweep across 45 steps that are logarithmically spaced ranging from  $10^{-6}$  to  $10^5$  on the validation set. For the final results, we fit the model on the combined training and validation sets and report the performance on the separate test set.

## C. Meta-input-output Details

### C.1 Meta-input-output Pairs

Here we provide the exact 16 meta-input-output pairs we used as templates for all four set ups: ChatGPT, Bard, Human and MSCOCO, described in Section 3.2. We use 'Source' to represent the meta-input text we sampled from the image-text datasets, and use 'Target' to represent the meta-output text generated by each of the strategies. Note the meta-input-output pairs showed in Figure 1 and Figure 2 in the main text are for illustration only, please refer to this section for the real pairs used in the experiments.

Table A3: Detailed pre-training hyper-parameters for CLIP training on all four image-text datasets.

| (a) Pre-training hyper-parameter on CC3M. |                                  | (b) Pre-training hyper-parameter on CC12M. |                                  |
|-------------------------------------------|----------------------------------|--------------------------------------------|----------------------------------|
| Config                                    | Value                            | Config                                     | Value                            |
| Batch size                                | 8, 192                           | Batch size                                 | 8, 192                           |
| Optimizer                                 | AdamW [17]                       | Optimizer                                  | AdamW [17]                       |
| Learning rate                             | $1 \times 10^{-3}$               | Learning rate                              | $1 \times 10^{-3}$               |
| Weight decay                              | 0.5                              | Weight decay                               | 0.5                              |
| Adam $\beta$                              | $\beta_1, \beta_2 = (0.9, 0.98)$ | Adam $\beta$                               | $\beta_1, \beta_2 = (0.9, 0.98)$ |
| Adam $\epsilon$                           | $1 \times 10^{-8}$               | Adam $\epsilon$                            | $1 \times 10^{-8}$               |
| Total epochs                              | 40                               | Total epochs                               | 35                               |
| Warm up epochs                            | 1                                | Warm up epochs                             | 1                                |
| Learning rate schedule                    | cosine decay                     | Learning rate schedule                     | cosine decay                     |

  

| (c) Pre-training hyper-parameter on RedCaps. |                                  | (d) Pre-training hyper-parameter on LAION-400M. |                                  |
|----------------------------------------------|----------------------------------|-------------------------------------------------|----------------------------------|
| Config                                       | Value                            | Config                                          | Value                            |
| Batch size                                   | 8, 192                           | Batch size                                      | 32, 768                          |
| Optimizer                                    | AdamW [17]                       | Optimizer                                       | AdamW [17]                       |
| Learning rate                                | $1 \times 10^{-3}$               | Learning rate                                   | $5 \times 10^{-4}$               |
| Weight decay                                 | 0.5                              | Weight decay                                    | 0.2                              |
| Adam $\beta$                                 | $\beta_1, \beta_2 = (0.9, 0.98)$ | Adam $\beta$                                    | $\beta_1, \beta_2 = (0.9, 0.98)$ |
| Adam $\epsilon$                              | $1 \times 10^{-8}$               | Adam $\epsilon$                                 | $1 \times 10^{-6}$               |
| Total epochs                                 | 30                               | Total epochs                                    | 32                               |
| Warm up epochs                               | 1                                | Warm up iterations                              | 2, 000                           |
| Learning rate schedule                       | cosine decay                     | Learning rate schedule                          | cosine decay                     |

Table A4: SLIP hyper-parameters.

| Config                 | Value                            |
|------------------------|----------------------------------|
| Batch size             | 8, 192                           |
| Optimizer              | AdamW [17]                       |
| Learning rate          | $3 \times 10^{-3}$               |
| Weight decay           | 0.1                              |
| Adam $\beta$           | $\beta_1, \beta_2 = (0.9, 0.98)$ |
| Adam $\epsilon$        | $1 \times 10^{-8}$               |
| Total epochs           | 35                               |
| Warm up epochs         | 1                                |
| Learning rate schedule | cosine decay                     |

Table A5: Detailed hyper-parameters on Linear-Probing on ImageNet.

| Config                 | Value        |
|------------------------|--------------|
| Batch size             | 1, 024       |
| Optimizer              | SGD          |
| Base learning rate     | <i>sweep</i> |
| Weight decay           | 0            |
| Momentum               | 0.9          |
| Training epochs        | 90           |
| Learning rate schedule | cosine decay |

### ChatGPT:

- Source:** white and red cheerful combination in the bedroom for girl  
**Target:** A bright and lively white-and-red color scheme in a girl’s bedroom, creating a cheerful ambiance.
- Source:** vintage photograph of a young boy feeding pigeons .  
**Target:** A charming vintage photograph capturing a young boy feeding a flock of pigeons in a bustling city square.
- Source:** businessman with smartphone sitting on ledge by the sea  
**Target:** Serene coastal view as a businessman sits on a ledge by the sea, using his smartphone.
- Source:** a tourist taking a photograph of river looking west towards suspension bridge and office  
**Target:** Tourist snaps photo of suspension bridge and office building across the river.
- Source:** glass of foods and food product on a sunny day  
**Target:** An assortment of food items and products displayed in a glass container, illuminated by bright sunshine.
- Source:** turtles and large fish in the pond  
**Target:** A tranquil pond where large fish and turtles coexist peacefully, creating a harmonious natural habitat.
- Source:** the frescoes inside the dome  
**Target:** The elaborate and intricate paintings or artworks adorning the inner surface of the dome, typically found in religious buildings.

8. **Source:** fight over a loose ball  
**Target:** Intense competition as players struggle to gain control of a loose ball during the game.
9. **Source:** love this winter picture by person .  
**Target:** Mesmerizing winter landscape by person: serene snowy scenery with gentle snowflakes, skillfully framed with perfect contrast and depth.
10. **Source:** one of several paths through the woods .  
**Target:** A narrow forest path, one among many weaving through the lush trees, underbrush, and dappled sunlight.
11. **Source:** ripe strawberries falling through the water .  
**Target:** Juicy ripe strawberries plummeting through a stream of water, splashing and creating ripples in the liquid.
12. **Source:** a city reflected on a red sunglasses .  
**Target:** The cityscape reflected on a pair of red sunglasses, creating a distorted but fascinating view of the urban environment.
13. **Source:** man driving a car through the mountains  
**Target:** A man confidently navigating a winding mountain road with breathtaking views.
14. **Source:** maritime museum from the historical dock .  
**Target:** A museum dedicated to seafaring history, located on a historic dock where visitors can view a collection of artifacts and vessels.
15. **Source:** tree hollow and green leaves of a tree top in summer  
**Target:** Amidst lush green leaves on the top of a tree, a hollow creates a natural shelter, typical of summer foliage.
16. **Source:** musician of musical group performs on stage on the first day of festival  
**Target:** On the opening day of the festival, a musician from a musical group performs energetically on stage to a lively crowd.

**Bard:**

1. **Source:** man driving a car through the mountains  
**Target:** A man drives his car through the mountains, the road winding its way through the towering peaks.
2. **Source:** a bicycle hanging above the entrance to a store  
**Target:** A bicycle suspended from a chain above the entrance to a bike shop advertises their services.
3. **Source:** government agency released underwater footage of the unique movements of starfish  
**Target:** New footage released by government agency shows starfish swimming in unique ways, shedding light on their underwater behavior.
4. **Source:** unique red chair among other white chairs at the stadium  
**Target:** Red chair stands out among white seats at stadium, a beacon of color.
5. **Source:** person looks comfortable as he connects with a free - kick during the session and is in line to return against hull on saturday  
**Target:** The player strikes a free-kick with confidence during training, looking sharp and ready for his return to the team against Hull on Saturday.
6. **Source:** animal in front of a white background  
**Target:** An animal stands out against the stark white background, its feathers on full display.
7. **Source:** a mother and daughter lying on a lawn  
**Target:** A mother and daughter embrace in the grass, enjoying the warmth of the sun and the sound of birdsong.
8. **Source:** sign is seen outside the home  
**Target:** A for sale sign stands in the front yard, a reminder that change is always on the horizon.
9. **Source:** portrait of person against an abstract background stock photo  
**Target:** person's face stands out against a swirling, abstract background, their expression one of mystery and intrigue.
10. **Source:** state flag waving on an isolated white background .  
**Target:** The state flag waves proudly against a stark white background. The colors of the flag are vibrant and the design is intricate, representing the history and culture of the state
11. **Source:** actor wears a gorgeous blush pink coloured gown at festival .  
**Target:** Actor stuns in blush pink gown at festival, her beauty a match for the flowers in bloom.
12. **Source:** person answering the phones again at the office .  
**Target:** A friendly voice answers the phone, eager to help the caller with their needs.

13. **Source:** little boy sitting on the grass with drone and remote controller  
**Target:** A young boy's eyes light up as he launches his drone into the sky, his imagination taking flight with it.
14. **Source:** golfer competes during day held  
**Target:** Golfer focuses on the ball as she competes in a tournament on a beautiful day.
15. **Source:** golden fish in a bowl  
**Target:** A golden fish swims lazily in a bowl, its scales shimmering in the sunlight. The fish is a beautiful shade of orange, with black spots on its fins and tail.
16. **Source:** businessman with smartphone sitting on ledge by the sea  
**Target:** A businessman relaxes on a seaside ledge, checking his phone and enjoying the view.

#### Human:

1. **Source:** Honey buttermilk biscuits on a cooling rack being drizzled with honey  
**Target:** A warm stack of freshly baked honey buttermilk biscuits, sit on a cooling rack as they are drizzled with golden honey
2. **Source:** happy corgi time  
**Target:** Delighted corgi stands in the hallway, looking at its owner
3. **Source:** <PERSON> dog looking at dirt from the ground  
**Target:** <Person>'s dog, lying on the ground, looks at the dirt
4. **Source:** navy vintage pants - lime green bag - ivory Maison Simons t-shirt - Zara clogs  
**Target:** A young beautiful lady wearing navy vintage pants and ivory Maison Simons t-shirt, is holding a lime green bag.
5. **Source:** Ooak Barbie City Shine  
**Target:** A custom-made Barbie doll with a city-inspired look shines brightly
6. **Source:** Real Wedding on a NYC Rooftop  
**Target:** a couple is kissing each other during their rooftop wedding in NYC
7. **Source:** the proud of my beloved italian bracco after leg amputation due to a tumor.  
**Target:** my italian bracco lied down proudly under the sunshile, despite of leg amputation due to a tumor.
8. **Source:** Pineapple Wearing Headphones Art Print by Philip Haynes  
**Target:** An art from Philip Haynes depicts a pineapple that wears headphones
9. **Source:** Ominous thunderclouds behind the Capitol Building  
**Target:** Thunderclouds loom over the Capitol Building, casting a dark shadow
10. **Source:** Steampunk woman with gun  
**Target:** A fierce and stylish steampunk woman holds a toy revolver in her hands
11. **Source:** a new watch with some old friends  
**Target:** The watch sits besides a cartoon picture, evoking memories of cherished times shared with long-time friends
12. **Source:** Particularly important to Africa is the East African Highland Banana (EAHB), a staple food for 80 million people. Uganda alone has about 120 varieties of this type of banana.  
**Target:** An African man holds a bunch of bananas, which is particularly important to Africa
13. **Source:** Electric Blue Guitar There Goes My Hero, Rock The Vote, <PERSON>, <PERSON>, Music Photo, Red Eyes, Photo Quotes, Electric Blue, Music Lyrics  
**Target:** <PERSON> is playing an electric blue guitar, eyes bloodshot from the stage lights
14. **Source:** Advanced Bicycle Skills Video - Valuable Video for Safe Cycl  
**Target:** A Cyclist is demonstrating advanced bicycle skills in a video that will help people stay safe.
15. **Source:** grilled turkey pesto sandwich  
**Target:** A grilled turkey pesto sandwich with melted cheese and fresh arugula is served on a plate.
16. **Source:** Actress <PERSON> during the launch of international fashion brand Forever 21 store at a mall in Mumbai on Saturday, October 12th, 2013.  
**Target:** The young beautiful actress attended the launch of fashion brand Forever 21 at a mall.

#### MSCOCO:

For the meta-input-output sampling using the MSCOCO strategy, we utilize the fact that there are five different captions associated with each image. In our approach, we randomly select two texts from the available five, with one serving as the meta-input and the other as the meta-output. Below is a list of the captions we employ for this purpose.

1. **Caption 1 :** A herd of goats walking down a road way.  
**Caption 2 :** Three lambs stand next to each other and look different directions.

- Caption 3 :** The animals standing in the clearing are 3 varieties of sheep.
- Caption 4 :** Three small sheep are standing on a road.
- Caption 5 :** Some animals are standing on a dirt path
2. **Caption 1 :** A boy is preparing to toss a frisbie while another boy is sitting in the background in a park.
- Caption 2 :** Several people are out in the woods on a path playing a game.
- Caption 3 :** A man in a park playing a throwing game.
- Caption 4 :** A group of people that are hanging out together.
- Caption 5 :** A boy gets ready to throw a frisbee
3. **Caption 1 :** A pizza sitting on top of a metal pan.
- Caption 2 :** The large pepperoni pizza is covered with chives.
- Caption 3 :** A pizza that is sitting on a tray.
- Caption 4 :** A large pizza with toppings sitting on a tray.
- Caption 5 :** a pizza with fresh basil tomato sauce and cheese baked
4. **Caption 1 :** A woman sits on top of a motorcycle in a parade.
- Caption 2 :** Woman wearing starts on helmet and shorts rides motorcycle
- Caption 3 :** A woman wearing attire that matches her motorcycle is driving on.
- Caption 4 :** A person that is on top of a motorcycle.
- Caption 5 :** Woman on a motorcycle rides in a parade
5. **Caption 1 :** the people are sampling wine at a wine tasting.
- Caption 2 :** Group of people tasting wine next to some barrels.
- Caption 3 :** People are gathered around a man tasting wine.
- Caption 4 :** A man pouring wine from casks for patrons
- Caption 5 :** People gather around a table while sampling wine.
6. **Caption 1 :** A herd of sheep walking down a street in front of a bus.
- Caption 2 :** There are three animals walking down the road.
- Caption 3 :** a van is stuck behind a few traveling goats
- Caption 4 :** a van that has some kind of animal out front of it
- Caption 5 :** A herd of animals walking down the road behind a truck.
7. **Caption 1 :** A sandwich with meat and cheese sits on a plate with a small salad.
- Caption 2 :** A sandwich with cheese and a bowl with a salad.
- Caption 3 :** Two plates with sandwiches on them next to a bowl of vegetables.
- Caption 4 :** A long sandwich and a salad is on a plate.
- Caption 5 :** a sandwich and a bowl of vegetables on a plate
8. **Caption 1 :** A NASA airplane carrying a space shuttle on its back.
- Caption 2 :** A large plan with a smaller plan on top of it.
- Caption 3 :** A NASA airplane carrying the old Space Shuttle
- Caption 4 :** A NASA airplane glides through the sky while carrying a shuttle.
- Caption 5 :** This jet is carrying a space shuttle on it
9. **Caption 1 :** A one way sign under a blue street sign.
- Caption 2 :** a view from below of a one way sign
- Caption 3 :** A street sign stating that the road is one way beneath a blue sky.
- Caption 4 :** A "One Way" street sign pointing to the right.
- Caption 5 :** A one way road sign mounted above a street sign.
10. **Caption 1 :** A bowl of food containing broccoli and tomatoes.
- Caption 2 :** A large salad is displayed in a silver metal bowl.
- Caption 3 :** A bowl of food with tomatoes, sliced apples, and other greens
- Caption 4 :** A silver bowl filled with various produce discards.
- Caption 5 :** The salad in the bowl contains many fresh fruits and vegetables.
11. **Caption 1 :** a cake made to look like it has candy decorations on it
- Caption 2 :** A photograph of a highly decorated cake on a table.
- Caption 3 :** A cake decorated with lollipops and a piece of pie.
- Caption 4 :** A piece of cake with lolypops, pie and caterpillar designs.
- Caption 5 :** A layered cake with sweet treats and a caterpillar as decorations.
12. **Caption 1 :** A young man riding a skateboard on a cement walkway.
- Caption 2 :** a guy riding a skateboard by a car
- Caption 3 :** A young man on a skateboard near a car
- Caption 4 :** an image of a boy on a skateboard doing tricks
- Caption 5 :** A young man is riding on his skateboard.



Table A6: Performance comparison of LaCLIP trained with different meta-input-output strategies on CC12M.  
(a) Zero-shot and Linear-probing Experiment Results

| Source         | Food-101 | CIFAR-10 | CIFAR-100 | SUN397 | Cars | Aircraft | DTD  | Pets | Caltech-101 | Flowers | STL-10 | EuroSAT | RESISC45 | GTSRB | Country211 | Average | ImageNet |
|----------------|----------|----------|-----------|--------|------|----------|------|------|-------------|---------|--------|---------|----------|-------|------------|---------|----------|
| Zero-shot      |          |          |           |        |      |          |      |      |             |         |        |         |          |       |            |         |          |
| ChatGPT        | 57.0     | 71.1     | 38.9      | 51.2   | 31.6 | 3.9      | 25.5 | 63.0 | 80.8        | 36.9    | 92.9   | 24.5    | 39.6     | 10.1  | 6.9        | 42.3    | 44.5     |
| Bard           | 55.2     | 70.1     | 39.4      | 51.7   | 31.5 | 4.6      | 25.2 | 63.3 | 80.6        | 34.5    | 92.5   | 20.7    | 39.6     | 10.1  | 7.2        | 41.7    | 44.8     |
| MSCOCO         | 54.9     | 66.3     | 39.1      | 52.6   | 29.0 | 4.2      | 24.9 | 67.7 | 79.3        | 33.1    | 93.8   | 27.8    | 38.2     | 13.2  | 7.1        | 42.1    | 44.6     |
| Human          | 56.4     | 69.1     | 39.1      | 51.7   | 31.4 | 3.8      | 22.9 | 68.1 | 80.6        | 38.4    | 94.3   | 26.9    | 43.0     | 11.7  | 7.5        | 43.0    | 45.1     |
| Linear-Probing |          |          |           |        |      |          |      |      |             |         |        |         |          |       |            |         |          |
| ChatGPT        | 81.5     | 94.0     | 79.4      | 73.0   | 77.2 | 54.7     | 75.1 | 87.1 | 92.2        | 96.0    | 97.3   | 96.6    | 92.3     | 81.0  | 19.9       | 79.8    | 71.2     |
| Bard           | 82.0     | 93.7     | 79.4      | 72.7   | 77.6 | 53.8     | 74.4 | 86.3 | 92.0        | 95.7    | 97.1   | 96.2    | 92.5     | 81.7  | 19.6       | 79.6    | 71.2     |
| MSCOCO         | 81.9     | 94.1     | 79.2      | 73.3   | 76.0 | 53.4     | 75.4 | 86.8 | 92.8        | 95.9    | 97.6   | 96.5    | 92.7     | 82.5  | 19.4       | 79.8    | 71.3     |
| Human          | 82.3     | 94.2     | 79.4      | 73.3   | 76.2 | 55.1     | 75.6 | 87.0 | 92.0        | 96.3    | 97.5   | 96.2    | 92.8     | 81.3  | 19.8       | 79.9    | 71.3     |

(b) Few-shot Experiment Results

| Source  | Food-101 | CIFAR-10 | CIFAR-100 | SUN397   | Cars     | Aircraft | DTD      | Pets     | Caltech-101 | Flowers  | STL-10   | EuroSAT  | RESISC45 | GTSRB    | Country211 |
|---------|----------|----------|-----------|----------|----------|----------|----------|----------|-------------|----------|----------|----------|----------|----------|------------|
| ChatGPT | 88.8±0.5 | 78.4±0.6 | 83.3±0.6  | 97.7±0.2 | 93.4±0.4 | 66.5±1.0 | 84.4±0.6 | 92.5±0.4 | 98.6±0.2    | 98.0±0.2 | 94.3±0.3 | 84.0±0.5 | 92.3±0.4 | 73.7±0.8 | 45.6±0.7   |
| Bard    | 89.2±0.5 | 80.1±0.6 | 83.4±0.6  | 97.7±0.2 | 93.3±0.4 | 66.3±1.0 | 84.3±0.6 | 93.2±0.4 | 98.6±0.2    | 98.1±0.2 | 94.9±0.3 | 83.2±0.5 | 92.2±0.4 | 74.2±0.8 | 45.6±0.7   |
| MSCOCO  | 88.6±0.5 | 79.5±0.6 | 82.7±0.6  | 97.8±0.2 | 93.7±0.4 | 65.1±1.0 | 84.4±0.6 | 92.5±0.4 | 98.7±0.2    | 98.1±0.2 | 95.0±0.3 | 84.9±0.5 | 91.6±0.4 | 74.3±0.8 | 44.9±0.7   |
| Human   | 88.6±0.5 | 78.4±0.6 | 83.2±0.6  | 97.7±0.2 | 93.7±0.4 | 66.1±1.0 | 84.7±0.6 | 93.0±0.4 | 98.6±0.2    | 98.2±0.2 | 94.4±0.3 | 83.5±0.5 | 92.2±0.4 | 74.1±0.8 | 45.7±0.7   |

13. **Caption 1** : A small brown dog sitting on display behind a window.  
**Caption 2** : A small fuzzy dog stares longingly out a window.  
**Caption 3** : The dog is brown shaggy with a red collar.  
**Caption 4** : A dog sits alone and stares out of a window.  
**Caption 5** : A furry and cute dog sitting in a window looking outside.
14. **Caption 1** : A herd of sheep standing on a lush green hillside.  
**Caption 2** : Several animals standing on the side of a hill.  
**Caption 3** : A number of sheep eat on a steep grassy hill.  
**Caption 4** : a couple of sheep are standing in some grass  
**Caption 5** : The side of a small hill of grass with several sheep grazing in the grass and houses in the background on the upper hill.
15. **Caption 1** : The tennis player on the blue court has his racquet raised.  
**Caption 2** : A man swinging a tennis racket at a pro tennis match.  
**Caption 3** : A tennis player wearing a NIKE shirt swings his racket  
**Caption 4** : Man posing in front of the camera holding up a tennis racket.  
**Caption 5** : A man wearing a white shirt playing tennis.
16. **Caption 1** : A surfer riding a wave in a tempestuous ocean  
**Caption 2** : Man in body suit surfing on a large wave.  
**Caption 3** : A surfer is sideways on a wave of water on a surfboard.  
**Caption 4** : The surfer is riding sideways along a wave.  
**Caption 5** : a surfer wearing a wet suit is surfing on a white board

## C.2 Detailed Experiment Results on Meta-Input-Output

We present a detailed analysis of the experiment results comparing different meta-input-output strategies. Specifically, for each of the four meta-input-output strategy (*ChatGPT*, *Bard*, *Human*, *MSCOCO*), we use this specific strategy as example candidates for LLaMA ICL, and generate a rewrite for every text in CC12M. Then we train four LaCLIP models, each model trained with the original captions and the rewrite version of one specific meta-input-output strategy. The comprehensive results of these experiments are summarized in Table A6. The results indicate that different meta-input-output strategy achieves similar performance.

## D. Augmentation Strategy Details

To help understand the effect of our proposed language rewriting strategy by LLaMA ICL, here we compare our proposed strategy with two widely used language augmentation baselines: EDA [31] and back translation [24].

- **EDA** contains four types of different randomly performed augmentation operations: Synonym Replacement, Random Insertion, Random Swap, and Random Deletion. We used the official implementation and kept all the default parameters as used in [31].
- **Back Translation** first translates the text to another language and then translate it back to English to generate slightly different version of the text. We chose four different languages for our experiments: Spanish, French, German and Italic languages.

### D.1 Augmentation Qualitative Comparison

We begin by presenting qualitative comparisons of different text augmentation strategies. It is observed that the EDA and back translation approaches primarily focus on word-level modifications, often preserving the sentence structures and leading to limited diversity in the rewritten texts. In contrast, our LLM-based augmentation strategy demonstrates the ability to substantially alter the sentence structure while maintaining the original key concepts and meaning intact. This results in more effective, diverse, and enriched rewritten texts, highlighting the superiority of our approach over word-based methods.

- **Original:** Handmade mirror in a wooden toned frame texture cracked paint with reflection green apple on the table. Handmade mirror in a wooden toned frame texture cracked stock photos  
**EDA Aug 1:** handmade mirror in a wooden toned frame texture cracked on with reflection green apple paint the table handmade mirror in a wooden toned frame texture cracked stock photos  
**EDA Aug 2:** handmade mirror in a wooden toned frame texture crock up cracked paint with reflection green apple angstrom unit on the table handmade mirror in a wooden toned frame texture cracked stock photos  
**Back Translation Spanish:** Hand-made mirror in the toned wood frame cracked texture paint with green apple reflection on the table. Hand-made mirror in the toned wood frame cracked texture stock photos  
**Back Translation French:** Hand-made mirror in a wood toned frame texture cracked paint with green apple reflection on the table. Hand-made mirror in a wood toned frame texture cracked stock photos  
**Back Translation German:** Handmade mirror in a wooden toned frame texture cracked color with reflection green apple on the table. Handmade mirror in a wooden toned frame texture cracked stock photos  
**LLM ChatGPT:** Mirror on wooden painted frame, over cracked stone, with green apple on the table. Handmade mirror in a wooden toned frame texture cracked stock photo  
**LLM Bard:** Green apple, still life, studio photography, abstract background  
**LLM MSCOCO:** a mirror on a table  
**LLM Human:** A closeup on a cracked mirror that reflects an apple on the table. The frame is covered in a golden toned wood grain texture.
- **Original:** Traffic jam on the road, a lot of cars which go towards each other and to the different directions  
**EDA Aug 1:** traffic jam on the road a lot of cars which go towards each other and to the different focus  
**EDA Aug 2:** traffic jam on the road a lot of cars which go towards each other and dissimilar to the different directions  
**Back Translation Spanish:** Traffic jam on the road, a lot of cars going towards the other and to the different directions  
**Back Translation French:** Traffic jams on the road, lots of cars going towards each other and towards different directions  
**Back Translation German:** Traffic jam on the road, a lot of cars that go to each other and to the different directions  
**LLM ChatGPT:** Traffic jam on the road, with a lot of cars moving in different directions, as well as towards each other.  
**LLM Bard:** A lot of cars line the street, all heading toward the same intersection.



**LLM MSCOCO:** Traffic jam on the road with cars going in different directions, some cars are on the same lane, others are on different lanes.

**LLM Human:** A traffic jam on the road. There are a lot of cars and many of them are going in different directions.

- **Original:** Green young small newborn tree growing on concrete road among dry fallen leaves given concept of the life beginning or strong surviving

**EDA Aug 1:** green young small newborn tree growing on concrete road among dry fallen leaves given concept of the life beginning or strong surviving

**EDA Aug 2:** green young small new sprung tree growing on concrete road among dry fallen leaves given conception of the life beginning or strong surviving

**Back Translation Spanish:** Young green small newborn tree growing on the concrete road between fallen dry leaves given the concept of the beginning of life or strong survival

**Back Translation French:** Young young-born green tree growing on the concrete road among the dried leaves fallen according to the concept of the beginning of life or strong survivor

**Back Translation German:** Green young little newborn tree growing on concrete road under dry fallen leaves given concept of life beginning or strong survival

**LLM ChatGPT:** Bold forest green, from endless tangle of vines, create a strong vertical accent on the concrete road. On the right side, two brown fallen leaves, littering the road, sit quietly and gracefully, almost as though they are praying.

**LLM Bard:** Green young small newborn tree growing on concrete road among dry fallen leaves giving concept of the life beginning or strong surviving

**LLM MSCOCO:** A bare tree trunk surrounded by fallen leaves.

**LLM Human:** a young and tall green tree on a concrete road among dry fallen leaves, its leaves on the floor. Concept is a strong surviving in harsh environment

- **Original:** Caused by the european solid wood floor lamp lamp creative decorative floor lamp floor lamp minimalist home japanese wood living room bedroom lights

**EDA Aug 1:** room by the european solid wood floor lamp lamp creative decorative floor lamp floor lamp minimalist home japanese wood bedroom caused living lights

**EDA Aug 2:** caused house by the european solid wood floor lamp lamp creative decorative floor lamp floor lamp minimalist home japanese wood living have room bedroom lights

**Back Translation Spanish:** Caused by European solid wood floor lamp European decorative floor lamp creative minimalist floor lamp Japanese home wood living room bedroom lights

**Back Translation French:** Cause of the European floor lamp in solid wood decorative floor lamp creative floor lamp minimalist floor lamp Japanese house living room light room bedroom

**Back Translation German:** Conditioned by the European solid wood floor lamp lamp creative decorative floor lamp floor lamp minimalist house Japanese wood living room bedroom lights

**LLM ChatGPT:** Due to the european style lighting system, the decorative floor lamp will enhance your living room decor.

**LLM Bard:** Because of the european solid wood floor lamp, creative floor lamp, decorative floor lamp, floor lamp, minimalist home, japanese wood living room, bedroom lights.

**LLM MSCOCO:** A furniture store with lamps on the shelves. One lamp is lit.

**LLM Human:** The european solid wood floor lamp creative decorative floor lamp floor lamp minimalist home japanese wood living room bedroom lights

- **Original:** A man, likely a railroad employee, stands in the forefront of the station by the tracks. In the background, groups of people lean against the building, perhaps waiting for a train. In the foreground is the switch tower.

**EDA Aug 1:** a man likely a railroad employee stands in the forefront of the station by the tracks in the background groups of inch people lean against the building perhaps waiting for a hulk train in the foreground is the transposition switch tower

**EDA Aug 2:** a military personnel likely a railroad employee stands in the forefront of the station by the tracks in the background groups of people lean against the building perhaps ready and waiting for a train in the foreground is the throw tower

**Back Translation Spanish:** A man, probably a railroad employee, is at the forefront of the station by the tracks. Deep down, groups of people lean on the building, perhaps waiting for a train. In the foreground is the switch tower.

**Back Translation French:** A man, probably a railway employee, stands at the vanguard of the station by the tracks. In the background, groups of people lean against the building, perhaps waiting for a train.

**Back Translation German:** A man, probably a railway worker, is standing at the top of the station

Table A7: Performance comparison of LaCLIP trained with different text augmentation strategies on CC12M.  
(a) Zero-shot and Linear-probing Experiment Results

| Augmentation          | Food-101    | CIFAR-10    | CIFAR-100   | SUN397      | Cars        | Aircraft    | DTD         | Pets        | Caltech-101 | Flowers     | STL-10      | EuroSAT     | RESISC45    | GTSRB       | Country211  | Average     | ImageNet    |
|-----------------------|-------------|-------------|-------------|-------------|-------------|-------------|-------------|-------------|-------------|-------------|-------------|-------------|-------------|-------------|-------------|-------------|-------------|
| Zero-shot             |             |             |             |             |             |             |             |             |             |             |             |             |             |             |             |             |             |
| N/A (CLIP)            | 50.8        | 64.9        | 38.5        | 44.7        | 24.1        | 2.4         | 19.4        | 64.1        | 77.4        | 33.2        | 91.0        | 20.1        | 38.9        | 7.3         | 5.1         | 38.8        | 40.2        |
| EDA [31]              | 51.9        | 67.6        | 36.5        | 48.2        | 27.7        | 2.8         | 25.4        | 64.7        | 78.2        | 33.3        | 92.8        | 21.9        | 40.0        | 10.8        | 6.6         | 40.6        | 41.2        |
| Back Translation [24] | 49.3        | 71.0        | 36.7        | 47.9        | 27.8        | 3.7         | 25.7        | 63.9        | 77.4        | 32.0        | 90.6        | 22.0        | 41.3        | 10.7        | 6.1         | 40.4        | 41.6        |
| LLM (Ours)            | <b>60.7</b> | <b>75.1</b> | <b>43.9</b> | <b>57.0</b> | <b>36.3</b> | <b>5.6</b>  | <b>31.0</b> | <b>72.4</b> | <b>83.3</b> | <b>39.9</b> | <b>95.1</b> | <b>27.3</b> | <b>44.3</b> | <b>12.7</b> | <b>8.9</b>  | <b>46.2</b> | <b>48.4</b> |
| Linear-Probing        |             |             |             |             |             |             |             |             |             |             |             |             |             |             |             |             |             |
| N/A (CLIP)            | 81.6        | 93.8        | 79.3        | 72.0        | 75.1        | 52.6        | 75.6        | 86.2        | 92.2        | 95.3        | 97.3        | 96.7        | 93.1        | 80.6        | 19.7        | 79.4        | 70.3        |
| EDA [31]              | 81.6        | 94.0        | 78.2        | 72.9        | 76.2        | 53.7        | 74.8        | 85.6        | 92.2        | 95.5        | 97.2        | 96.8        | 92.9        | 79.9        | <b>20.1</b> | 79.4        | 70.5        |
| Back Translation [24] | 81.8        | 94.2        | 78.2        | 73.0        | 77.5        | <b>54.6</b> | 75.5        | 87.1        | 91.6        | 96.0        | 97.5        | <b>97.1</b> | 93.1        | 80.0        | 20.0        | 79.8        | 70.7        |
| LLM (Ours)            | <b>82.9</b> | <b>94.7</b> | <b>79.7</b> | <b>73.8</b> | <b>79.9</b> | 54.5        | <b>75.7</b> | <b>87.7</b> | <b>93.0</b> | <b>96.4</b> | <b>98.0</b> | 96.4        | 93.0        | <b>81.9</b> | 19.7        | <b>80.5</b> | <b>72.3</b> |

(b) Few-shot Experiment Results

| Augmentation    | Food-101                       | CIFAR-10                       | CIFAR-100                      | SUN397                         | Cars                           | Aircraft                       | DTD                            | Pets                           | Caltech-101                    | Flowers                        | STL-10                         | EuroSAT                        | RESISC45                       | GTSRB                          | Country211                     |
|-----------------|--------------------------------|--------------------------------|--------------------------------|--------------------------------|--------------------------------|--------------------------------|--------------------------------|--------------------------------|--------------------------------|--------------------------------|--------------------------------|--------------------------------|--------------------------------|--------------------------------|--------------------------------|
| N/A (CLIP)      | 87.0 $\pm$ 0.5                 | 77.5 $\pm$ 0.6                 | 82.1 $\pm$ 0.7                 | 97.2 $\pm$ 0.2                 | 90.9 $\pm$ 0.5                 | 62.0 $\pm$ 1.0                 | 83.3 $\pm$ 0.6                 | 91.1 $\pm$ 0.5                 | 98.2 $\pm$ 0.2                 | 97.6 $\pm$ 0.2                 | 92.6 $\pm$ 0.4                 | 83.4 $\pm$ 0.5                 | 91.2 $\pm$ 0.4                 | 70.6 $\pm$ 0.8                 | 44.3 $\pm$ 0.7                 |
| EDA [31]        | 88.1 $\pm$ 0.5                 | 76.1 $\pm$ 0.6                 | 81.3 $\pm$ 0.7                 | 97.6 $\pm$ 0.2                 | 91.7 $\pm$ 0.5                 | 62.9 $\pm$ 1.0                 | 83.4 $\pm$ 0.6                 | 91.9 $\pm$ 0.5                 | 98.4 $\pm$ 0.2                 | 97.8 $\pm$ 0.2                 | 93.5 $\pm$ 0.3                 | <b>84.3<math>\pm</math>0.5</b> | 91.6 $\pm$ 0.4                 | 68.4 $\pm$ 0.8                 | 44.6 $\pm$ 0.7                 |
| Back Trans [24] | 88.1 $\pm$ 0.5                 | 76.9 $\pm$ 0.6                 | 82.5 $\pm$ 0.7                 | 97.5 $\pm$ 0.2                 | 91.8 $\pm$ 0.4                 | 65.1 $\pm$ 1.0                 | 83.7 $\pm$ 0.6                 | 92.5 $\pm$ 0.4                 | 98.3 $\pm$ 0.2                 | 97.9 $\pm$ 0.2                 | 94.2 $\pm$ 0.3                 | 83.3 $\pm$ 0.5                 | 91.1 $\pm$ 0.4                 | 70.8 $\pm$ 0.8                 | 45.1 $\pm$ 0.7                 |
| LLM (Ours)      | <b>89.9<math>\pm</math>0.5</b> | <b>81.3<math>\pm</math>0.5</b> | <b>85.0<math>\pm</math>0.6</b> | <b>98.0<math>\pm</math>0.2</b> | <b>95.3<math>\pm</math>0.3</b> | <b>68.1<math>\pm</math>1.0</b> | <b>84.9<math>\pm</math>0.6</b> | <b>93.4<math>\pm</math>0.4</b> | <b>98.9<math>\pm</math>0.2</b> | <b>98.4<math>\pm</math>0.2</b> | <b>95.9<math>\pm</math>0.2</b> | 83.0 $\pm$ 0.5                 | <b>92.4<math>\pm</math>0.4</b> | <b>76.4<math>\pm</math>0.8</b> | <b>46.7<math>\pm</math>0.7</b> |

on the tracks. In the background, groups of people are leaning against the building, perhaps waiting for a train.

**LLM ChatGPT:** A man, likely a railroad employee, stands by the tracks in front of the station. In the background, groups of people lean against the building. In the foreground is the switch tower.

**LLM Bard:** man leaning against the rail station and switch tower in a dark night with a fog

**LLM MSCOCO:** A portrait of the man in the front of the station is seen in the upper left. In the lower right is a man leaning on a post with his arms crossed.

**LLM Human:** An image of a man, likely a railroad employee, standing in the foreground of a train station by the tracks. In the background are groups of people, some leaning against the building, which could be waiting for a train. In the foreground are the tracks with a switch tower in the distance.

## D.2 Detailed Experiment Results on Augmentation Strategy

We conducted a quantitative comparison of different augmentation strategies while ensuring a fair evaluation by generating a consistent number of augmented texts per original sentence (i.e., 4).

For the EDA strategy, we created 4 distinct versions of each sentence by randomly applying their predefined augmentation operations. As for the back translation approach, we translated the original texts into four different languages (Spanish, French, German, and Italic languages) and then back to English, resulting in 4 rewritten versions of the original texts. In our LLM-based augmentation, we used LLaMA ICL to generate 4 augmentations prompted by the 4 predefined meta-input-output pairs (ChatGPT, Bard, Human, and MSCOCO).

A comprehensive comparison of these strategies is presented in Table A7. The results demonstrate that while the baseline augmentation strategies improve the performance of the vanilla CLIP baseline, our proposed LLM-based augmentation strategy consistently achieves superior results across various datasets and evaluation metrics, outperforming the other augmentation methods significantly.

Table A8: Performance comparison of CLIP and LaCLIP trained with different text augmentation strategies with different number of augmentations per original text on CC12M.

(a) Zero-shot and Linear-probing Experiment Results

| Augment / Num  | Food-101    | CIFAR-10    | CIFAR-100   | SUN397      | Cars        | Aircraft    | DTD         | Pets        | Caltech-101 | Flowers     | STL-10      | EuroSAT     | RESISC45    | GTSRB       | Country211  | Average     | ImageNet    |  |
|----------------|-------------|-------------|-------------|-------------|-------------|-------------|-------------|-------------|-------------|-------------|-------------|-------------|-------------|-------------|-------------|-------------|-------------|--|
| Zero-shot      |             |             |             |             |             |             |             |             |             |             |             |             |             |             |             |             |             |  |
| N/A (CLIP) / 0 | 50.8        | 64.9        | 38.5        | 44.7        | 24.1        | 2.4         | 19.4        | 64.1        | 77.4        | 33.2        | 91.0        | 20.1        | 38.9        | 7.3         | 5.1         | 38.8        | 40.2        |  |
| EDA / 1        | 52.2        | 66.2        | 34.3        | 46.6        | 25.6        | 3.6         | 22.2        | 64.5        | 79.3        | 33.5        | 90.9        | 24.1        | 37.6        | 13.4        | 5.6         | 40.0        | 40.2        |  |
| EDA / 2        | 49.8        | 62.4        | 32.1        | 47.1        | 28.1        | 2.2         | 25.3        | 64.6        | 79.1        | 31.4        | 92.3        | 12.6        | 38.0        | 13.1        | 5.7         | 38.9        | 41.1        |  |
| EDA / 3        | 50.4        | 62.8        | 35.4        | 49.7        | 26.8        | 2.5         | 24.5        | 69.5        | 77.4        | 33.1        | 92.8        | 24.9        | 37.3        | 15.1        | 6.7         | 40.6        | 41.7        |  |
| EDA / 4        | 51.9        | 67.6        | 36.5        | 48.2        | 27.7        | 2.8         | 25.4        | 64.7        | 78.2        | 33.3        | 92.8        | 21.9        | 40.0        | 10.8        | 6.6         | 40.6        | 41.2        |  |
| Back Trans / 1 | 49.7        | 61.5        | 34.6        | 45.5        | 26.7        | 4.0         | 20.7        | 59.2        | 77.2        | 32.1        | 88.2        | 27.1        | 40.0        | 12.6        | 5.8         | 39.0        | 40.1        |  |
| Back Trans / 2 | 50.0        | 55.4        | 35.5        | 44.3        | 29.0        | 5.2         | 21.0        | 67.4        | 78.5        | 32.6        | 89.4        | 19.6        | 38.4        | 7.6         | 6.2         | 38.7        | 41.0        |  |
| Back Trans / 3 | 49.9        | 67.3        | 37.6        | 46.9        | 26.7        | 4.1         | 22.8        | 65.7        | 76.8        | 34.3        | 91.7        | 20.0        | 34.3        | 12.5        | 6.3         | 39.8        | 41.5        |  |
| Back Trans / 4 | 49.3        | 71.0        | 36.7        | 47.9        | 27.8        | 3.7         | 25.7        | 63.9        | 77.4        | 32.0        | 90.6        | 22.0        | 41.3        | 10.7        | 6.1         | 40.4        | 41.6        |  |
| LLM (Ours) / 1 | 57.0        | 71.1        | 38.9        | 51.2        | 31.6        | 3.9         | 25.5        | 63.0        | 80.8        | 36.9        | 92.9        | 24.5        | 39.6        | 10.1        | 6.9         | 42.3        | 44.5        |  |
| LLM (Ours) / 2 | 57.0        | 70.3        | 41.3        | 54.2        | 34.2        | 5.8         | 29.0        | 64.0        | 79.5        | 38.5        | 94.4        | 33.0        | 38.6        | 9.1         | 8.2         | 43.8        | 46.5        |  |
| LLM (Ours) / 3 | 59.7        | 75.0        | 42.6        | 56.5        | 34.0        | 5.1         | 29.4        | 65.8        | 81.3        | 38.2        | 94.7        | 18.7        | 42.4        | 13.4        | 8.7         | 44.4        | 47.7        |  |
| LLM (Ours) / 4 | <b>60.7</b> | <b>75.1</b> | <b>43.9</b> | <b>57.0</b> | <b>36.3</b> | <b>5.6</b>  | <b>31.0</b> | <b>72.4</b> | <b>83.3</b> | <b>39.9</b> | <b>95.1</b> | <b>27.3</b> | <b>44.3</b> | <b>12.7</b> | <b>8.9</b>  | <b>46.2</b> | <b>48.4</b> |  |
| Linear-Probing |             |             |             |             |             |             |             |             |             |             |             |             |             |             |             |             |             |  |
| N/A (CLIP) / 0 | 81.6        | 93.8        | 79.3        | 72.0        | 75.1        | 52.6        | 75.6        | 86.2        | 92.2        | 95.3        | 97.3        | 96.7        | 93.1        | 80.6        | 19.7        | 79.4        | 70.3        |  |
| EDA / 1        | 81.5        | 93.3        | 78.0        | 72.1        | 75.6        | 53.1        | 76.5        | 85.9        | 91.5        | 95.8        | 97.3        | 96.4        | 92.6        | 80.0        | 19.9        | 79.3        | 70.4        |  |
| EDA / 2        | 81.4        | 94.1        | 80.2        | 72.5        | 76.7        | 52.9        | 75.7        | 85.8        | 92.1        | 95.7        | 97.2        | 96.7        | 92.7        | 81.6        | 19.9        | 79.7        | 70.6        |  |
| EDA / 3        | 81.3        | 93.6        | 78.8        | 72.3        | 74.5        | 53.3        | 75.1        | 86.0        | 91.1        | 95.6        | 97.3        | 96.7        | 93.0        | 79.1        | 19.7        | 79.2        | 70.6        |  |
| EDA / 4        | 81.6        | 94.0        | 78.2        | 72.9        | 76.2        | 53.7        | 74.8        | 85.6        | 92.2        | 95.5        | 97.2        | 96.8        | 92.9        | 79.9        | 20.1        | 79.4        | 70.5        |  |
| Back Trans / 1 | 81.5        | 93.4        | 78.3        | 72.4        | 76.9        | 52.5        | 74.8        | 85.7        | 92.0        | 95.5        | 97.4        | 96.9        | <b>93.2</b> | 81.6        | 19.8        | 79.5        | 70.5        |  |
| Back Trans / 2 | 81.5        | 93.9        | 78.5        | 72.4        | 76.3        | 52.8        | 74.5        | 86.2        | 91.7        | 95.5        | 97.5        | 96.8        | 92.4        | 80.5        | 19.4        | 79.3        | 70.5        |  |
| Back Trans / 3 | 81.6        | 93.5        | 78.0        | 72.4        | 75.9        | 52.1        | 73.8        | 86.2        | 92.1        | 95.1        | 97.3        | 96.5        | 92.3        | 79.4        | 19.9        | 79.1        | 70.5        |  |
| Back Trans / 4 | 81.8        | 94.2        | 78.2        | 73.0        | 77.5        | 54.6        | 75.5        | 87.1        | 91.6        | 96.0        | 97.5        | <b>97.1</b> | 93.1        | 80.0        | 20.0        | 79.8        | 70.7        |  |
| LLM (Ours) / 1 | 81.8        | 94.3        | 79.7        | 73.3        | 77.5        | 55.0        | 75.4        | 87.4        | 92.5        | 96.3        | 97.6        | 96.9        | 92.6        | 81.3        | <b>20.2</b> | 80.1        | 71.2        |  |
| LLM (Ours) / 2 | 82.3        | 94.0        | 79.1        | 73.3        | 77.6        | 52.7        | 76.0        | 86.8        | 91.8        | 96.1        | 97.7        | 96.6        | 93.1        | 83.3        | 20.1        | 80.0        | 71.7        |  |
| LLM (Ours) / 3 | 82.3        | 94.7        | 80.0        | 73.7        | 79.2        | <b>56.0</b> | 75.7        | 87.0        | 92.9        | 96.2        | 98.0        | 96.6        | 92.9        | 83.1        | 20.0        | 80.6        | 71.9        |  |
| LLM (Ours) / 4 | <b>82.9</b> | <b>94.7</b> | <b>79.7</b> | <b>73.8</b> | <b>79.9</b> | 54.5        | <b>75.7</b> | <b>87.7</b> | <b>93.0</b> | <b>96.4</b> | <b>98.0</b> | 96.4        | 93.0        | <b>81.9</b> | 19.7        | <b>80.5</b> | <b>72.3</b> |  |

(b) Few-shot Experiment Results

| Augment / Num  | Food-101              | CIFAR-10              | CIFAR-100             | SUN397                | Cars                  | Aircraft              | DTD                   | Pets                  | Caltech-101           | Flowers               | STL-10                | EuroSAT               | RESISC45              | GTSRB                 | Country211            |
|----------------|-----------------------|-----------------------|-----------------------|-----------------------|-----------------------|-----------------------|-----------------------|-----------------------|-----------------------|-----------------------|-----------------------|-----------------------|-----------------------|-----------------------|-----------------------|
| N/A (CLIP) / 0 | 87.0 $\pm$ 0.5        | 77.5 $\pm$ 0.6        | 82.1 $\pm$ 0.7        | 97.2 $\pm$ 0.2        | 90.9 $\pm$ 0.5        | 62.0 $\pm$ 1.0        | 83.3 $\pm$ 0.6        | 91.1 $\pm$ 0.5        | 98.2 $\pm$ 0.2        | 97.6 $\pm$ 0.2        | 92.6 $\pm$ 0.4        | 83.4 $\pm$ 0.5        | 91.2 $\pm$ 0.4        | 70.6 $\pm$ 0.8        | 44.3 $\pm$ 0.7        |
| EDA / 1        | 87.6 $\pm$ 0.5        | 75.4 $\pm$ 0.6        | 81.3 $\pm$ 0.7        | 97.4 $\pm$ 0.2        | 91.3 $\pm$ 0.5        | 62.6 $\pm$ 1.0        | 83.5 $\pm$ 0.6        | 91.5 $\pm$ 0.5        | 98.2 $\pm$ 0.2        | 97.8 $\pm$ 0.2        | 93.0 $\pm$ 0.3        | 83.2 $\pm$ 0.5        | 91.4 $\pm$ 0.4        | 68.9 $\pm$ 0.8        | 44.4 $\pm$ 0.7        |
| EDA / 2        | 87.9 $\pm$ 0.5        | 77.3 $\pm$ 0.6        | 82.0 $\pm$ 0.6        | 97.4 $\pm$ 0.2        | 91.9 $\pm$ 0.4        | 62.8 $\pm$ 1.0        | 83.5 $\pm$ 0.6        | 92.1 $\pm$ 0.4        | 98.4 $\pm$ 0.2        | 97.8 $\pm$ 0.2        | 93.6 $\pm$ 0.3        | 82.8 $\pm$ 0.6        | 91.6 $\pm$ 0.4        | 70.0 $\pm$ 0.8        | 44.8 $\pm$ 0.7        |
| EDA / 3        | 87.5 $\pm$ 0.5        | 76.5 $\pm$ 0.6        | 82.0 $\pm$ 0.7        | 97.6 $\pm$ 0.2        | 91.2 $\pm$ 0.5        | 62.7 $\pm$ 1.0        | 83.8 $\pm$ 0.6        | 91.3 $\pm$ 0.5        | 98.2 $\pm$ 0.2        | 97.7 $\pm$ 0.2        | 94.2 $\pm$ 0.3        | 84.0 $\pm$ 0.5        | 91.4 $\pm$ 0.4        | 72.0 $\pm$ 0.8        | 44.3 $\pm$ 0.7        |
| EDA / 4        | 88.1 $\pm$ 0.5        | 76.1 $\pm$ 0.6        | 81.3 $\pm$ 0.7        | 97.6 $\pm$ 0.2        | 91.7 $\pm$ 0.5        | 62.9 $\pm$ 1.0        | 83.4 $\pm$ 0.6        | 91.9 $\pm$ 0.5        | 98.4 $\pm$ 0.2        | 97.8 $\pm$ 0.2        | 93.5 $\pm$ 0.3        | <b>84.3</b> $\pm$ 0.5 | 91.1 $\pm$ 0.4        | 68.4 $\pm$ 0.8        | 44.6 $\pm$ 0.7        |
| Back Trans / 1 | 87.8 $\pm$ 0.5        | 76.4 $\pm$ 0.6        | 81.8 $\pm$ 0.7        | 97.4 $\pm$ 0.2        | 91.7 $\pm$ 0.5        | 63.4 $\pm$ 1.0        | 83.8 $\pm$ 0.6        | 91.7 $\pm$ 0.5        | 98.3 $\pm$ 0.2        | 97.7 $\pm$ 0.2        | 93.1 $\pm$ 0.3        | 83.9 $\pm$ 0.5        | 91.6 $\pm$ 0.4        | 70.1 $\pm$ 0.8        | 44.7 $\pm$ 0.8        |
| Back Trans / 2 | 87.8 $\pm$ 0.5        | 75.6 $\pm$ 0.6        | 81.6 $\pm$ 0.7        | 97.5 $\pm$ 0.2        | 92.3 $\pm$ 0.4        | 62.8 $\pm$ 1.0        | 83.7 $\pm$ 0.6        | 92.5 $\pm$ 0.4        | 98.3 $\pm$ 0.2        | 97.8 $\pm$ 0.2        | 93.6 $\pm$ 0.3        | 83.8 $\pm$ 0.5        | 91.1 $\pm$ 0.4        | 68.8 $\pm$ 0.8        | 44.7 $\pm$ 0.7        |
| Back Trans / 3 | 88.2 $\pm$ 0.5        | 77.0 $\pm$ 0.6        | 82.8 $\pm$ 0.6        | 97.4 $\pm$ 0.2        | 91.7 $\pm$ 0.4        | 62.6 $\pm$ 1.0        | 83.8 $\pm$ 0.6        | 91.6 $\pm$ 0.5        | 98.3 $\pm$ 0.2        | 97.7 $\pm$ 0.2        | 93.3 $\pm$ 0.3        | 83.1 $\pm$ 0.5        | 91.8 $\pm$ 0.4        | 71.0 $\pm$ 0.8        | 45.0 $\pm$ 0.7        |
| Back Trans / 4 | 88.1 $\pm$ 0.5        | 76.9 $\pm$ 0.6        | 82.5 $\pm$ 0.7        | 97.5 $\pm$ 0.2        | 91.8 $\pm$ 0.4        | 65.1 $\pm$ 1.0        | 83.7 $\pm$ 0.6        | 92.5 $\pm$ 0.4        | 98.3 $\pm$ 0.2        | 97.9 $\pm$ 0.2        | 94.2 $\pm$ 0.3        | 83.3 $\pm$ 0.5        | 91.1 $\pm$ 0.4        | 70.8 $\pm$ 0.8        | 45.1 $\pm$ 0.7        |
| LLM (Ours) / 1 | 88.8 $\pm$ 0.5        | 78.4 $\pm$ 0.6        | 83.3 $\pm$ 0.6        | 97.7 $\pm$ 0.2        | 93.4 $\pm$ 0.4        | 66.5 $\pm$ 1.0        | 84.4 $\pm$ 0.6        | 92.5 $\pm$ 0.4        | 98.6 $\pm$ 0.2        | 98.0 $\pm$ 0.2        | 94.3 $\pm$ 0.3        | 84.0 $\pm$ 0.5        | 92.3 $\pm$ 0.4        | 73.7 $\pm$ 0.8        | 45.6 $\pm$ 0.7        |
| LLM (Ours) / 2 | 89.2 $\pm$ 0.5        | 79.1 $\pm$ 0.6        | 83.6 $\pm$ 0.6        | 97.9 $\pm$ 0.2        | 94.2 $\pm$ 0.4        | 65.6 $\pm$ 1.0        | 84.2 $\pm$ 0.6        | 93.2 $\pm$ 0.4        | 98.8 $\pm$ 0.2        | 98.2 $\pm$ 0.2        | 95.3 $\pm$ 0.3        | 83.6 $\pm$ 0.5        | 91.7 $\pm$ 0.4        | 75.6 $\pm$ 0.8        | 46.1 $\pm$ 0.7        |
| LLM (Ours) / 3 | 89.8 $\pm$ 0.5        | <b>82.5</b> $\pm$ 0.5 | 84.2 $\pm$ 0.6        | <b>98.0</b> $\pm$ 0.2 | 94.4 $\pm$ 0.4        | <b>68.5</b> $\pm$ 1.0 | <b>85.0</b> $\pm$ 0.6 | <b>93.4</b> $\pm$ 0.4 | 98.7 $\pm$ 0.2        | 98.4 $\pm$ 0.2        | <b>95.9</b> $\pm$ 0.2 | <b>83.9</b> $\pm$ 0.5 | 91.6 $\pm$ 0.4        | 75.1 $\pm$ 0.8        | <b>46.9</b> $\pm$ 0.7 |
| LLM (Ours) / 4 | <b>89.9</b> $\pm$ 0.5 | 81.3 $\pm$ 0.5        | <b>85.0</b> $\pm$ 0.6 | <b>98.0</b> $\pm$ 0.2 | <b>95.3</b> $\pm$ 0.3 | 68.1 $\pm$ 1.0        | 84.9 $\pm$ 0.6        | <b>93.4</b> $\pm$ 0.4 | <b>98.9</b> $\pm$ 0.2 | <b>98.4</b> $\pm$ 0.2 | <b>95.9</b> $\pm$ 0.2 | 83.0 $\pm$ 0.5        | <b>92.4</b> $\pm$ 0.4 | <b>76.4</b> $\pm$ 0.8 | 46.7 $\pm$ 0.7        |

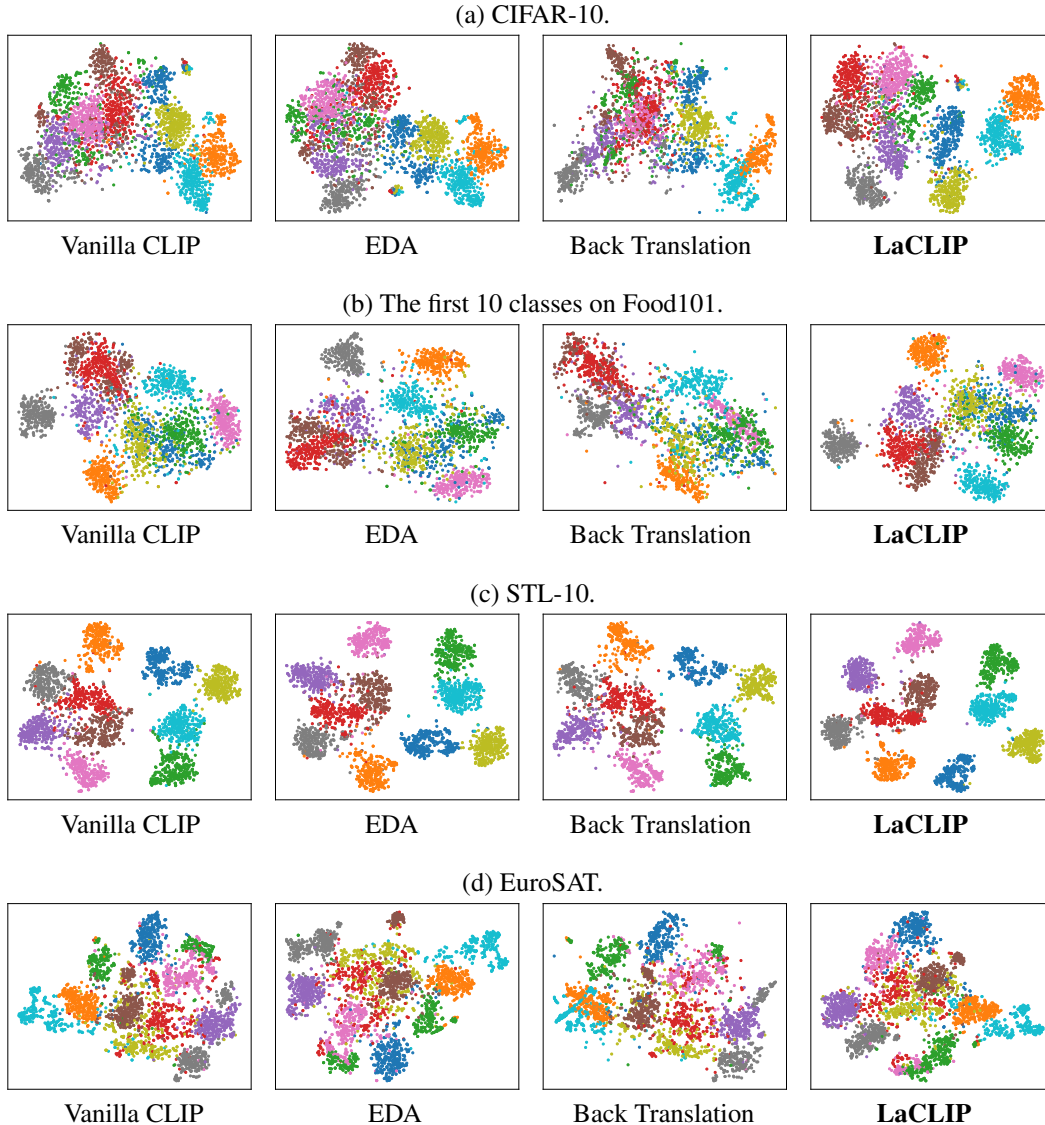

Figure A1: t-SNE visualization of image features learned from Vanilla CLIP, two baseline text augmentations strategies (EDA and back translation), and our proposed LaCLIP on CIFAR-10, Food101, STL-10, and EuroSAT datasets. Image features learned from our proposed LaCLIP have a clearer class boundaries and cluster centroids.

## E. Number of Augmentations per Original Text

We conducted experiments to investigate how the performance varies with the number of augmentations generated for each text and the differences between augmentation strategies as the number of augmentations per original text increases. We examined the performance of each strategy with 0 to 4 augmentations per original text, where 0 corresponds to vanilla CLIP without any text augmentation. Specifically, for each specific number of augmentations  $k$ : For EDA, we selected  $k$  versions out of the 4 generated versions. In the case of back translation, we used *Spanish*, *Spanish+French*, *Spanish+French+German*, and *Spanish+French+German+Italic languages* for  $k = 1, 2, 3, 4$ , respectively. Regarding our LLM-based augmentation, we used *ChatGPT*, *ChatGPT+Bard*, *ChatGPT+Bard+MSCOCO*, and *ChatGPT+Bard+MSCOCO+Human* as augmentations corresponding to  $k = 1, 2, 3, 4$ , respectively.

The detailed comparison can be found in Table A8. From the results, we observe that the performance of the baseline augmentation strategies does not scale well with the number of augmentations per sentence, indicating limited diversity in the rewritten texts. This aligns with the findings in [31], where the best results are obtained with four different augmentations. In contrast, LaCLIP trained

Table A9: Performance comparison of CLIP, LaCLIP and LaCLIP-MT trained on CC12M and RedCaps.  
(a) Zero-shot and Linear-probing Experiment Results

| Data           | Model     | Food-101    | CIFAR-10    | CIFAR-100   | SUN397      | Cars        | Aircraft    | DTD         | Pets        | Caltech-101 | Flowers     | STL-10      | EuroSAT     | RESISC45    | GTSRB       | Country211  | Average     | ImageNet    |  |
|----------------|-----------|-------------|-------------|-------------|-------------|-------------|-------------|-------------|-------------|-------------|-------------|-------------|-------------|-------------|-------------|-------------|-------------|-------------|--|
| Zero-shot      |           |             |             |             |             |             |             |             |             |             |             |             |             |             |             |             |             |             |  |
| CC12M          | CLIP      | 50.8        | 64.9        | 38.5        | 44.7        | 24.1        | 2.4         | 19.4        | 64.1        | 77.4        | 33.2        | 91.0        | 20.1        | 38.9        | 7.3         | 5.1         | 38.8        | 40.2        |  |
|                | LaCLIP    | <b>60.7</b> | <b>75.1</b> | <b>43.9</b> | <b>57.0</b> | <b>36.3</b> | <b>5.6</b>  | <b>31.0</b> | 72.4        | <b>83.3</b> | 39.9        | 95.1        | <b>27.3</b> | <b>44.3</b> | 12.7        | <b>8.9</b>  | <b>46.2</b> | 48.4        |  |
|                | LaCLIP-MT | 59.2        | 69.5        | 39.0        | 56.8        | 34.4        | 5.5         | 30.7        | <b>72.8</b> | 83.1        | <b>42.5</b> | <b>95.2</b> | 24.8        | 43.4        | <b>13.1</b> | 8.3         | 45.2        | <b>49.0</b> |  |
| RedCaps        | CLIP      | 81.5        | 70.4        | 39.9        | 33.2        | 19.2        | 1.9         | 19.7        | 82.7        | 72.8        | 53.9        | <b>92.8</b> | 23.3        | 33.6        | <b>8.3</b>  | 6.2         | 42.6        | 42.9        |  |
|                | LaCLIP    | <b>85.0</b> | 74.8        | 40.7        | 40.3        | 21.3        | <b>2.2</b>  | 23.9        | 78.2        | 76.4        | 59.0        | 91.4        | 27.1        | <b>41.3</b> | 5.6         | 7.6         | 45.0        | 46.2        |  |
|                | LaCLIP-MT | 84.2        | <b>74.9</b> | <b>43.1</b> | <b>40.5</b> | <b>23.0</b> | 1.9         | <b>24.0</b> | <b>84.7</b> | <b>77.1</b> | <b>60.9</b> | 91.0        | <b>31.9</b> | 40.3        | 6.1         | <b>7.9</b>  | <b>46.1</b> | <b>48.1</b> |  |
| Linear-Probing |           |             |             |             |             |             |             |             |             |             |             |             |             |             |             |             |             |             |  |
| CC12M          | CLIP      | 81.6        | 93.8        | 79.3        | 72.0        | 75.1        | 52.6        | 75.6        | 86.2        | 92.2        | 95.3        | 97.3        | <b>96.7</b> | 93.1        | 80.6        | 19.7        | 79.4        | 70.3        |  |
|                | LaCLIP    | 82.9        | <b>94.7</b> | 79.7        | <b>73.8</b> | <b>79.9</b> | 54.5        | 75.7        | 87.7        | 93.0        | 96.4        | <b>98.0</b> | 96.4        | 93.0        | 81.9        | 19.7        | 80.5        | 72.3        |  |
|                | LaCLIP-MT | 82.9        | 94.5        | 79.7        | 73.7        | 79.4        | <b>55.0</b> | <b>76.0</b> | <b>87.9</b> | 93.0        | 96.4        | 97.6        | 96.2        | 93.1        | <b>82.7</b> | <b>20.2</b> | <b>80.6</b> | <b>72.4</b> |  |
| RedCaps        | CLIP      | 89.1        | 94.1        | 78.8        | 65.6        | 74.0        | 52.5        | 73.2        | 91.5        | 91.4        | 97.7        | 98.0        | 96.3        | <b>93.5</b> | 80.8        | 17.0        | 79.6        | 71.8        |  |
|                | LaCLIP    | 90.1        | <b>94.3</b> | 78.5        | 66.6        | 77.6        | <b>53.6</b> | 73.9        | 90.8        | <b>91.5</b> | 97.9        | 97.6        | 96.6        | 92.7        | 80.8        | 17.2        | 80.0        | 71.9        |  |
|                | LaCLIP-MT | <b>90.2</b> | 94.0        | <b>79.0</b> | <b>67.3</b> | <b>79.2</b> | 53.2        | <b>75.3</b> | <b>91.7</b> | 91.0        | <b>98.3</b> | <b>98.1</b> | <b>96.9</b> | 93.0        | 80.6        | 17.2        | <b>80.3</b> | <b>72.4</b> |  |

(b) Few-shot Experiment Results

| Model                  | Food-101                       | CIFAR-10                       | CIFAR-100                      | SUN397                         | Cars                           | Aircraft                       | DTD                            | Pets                           | Caltech-101                    | Flowers                        | STL-10                         | EuroSAT                        | RESISC45                       | GTSRB                          | Country211                     |  |
|------------------------|--------------------------------|--------------------------------|--------------------------------|--------------------------------|--------------------------------|--------------------------------|--------------------------------|--------------------------------|--------------------------------|--------------------------------|--------------------------------|--------------------------------|--------------------------------|--------------------------------|--------------------------------|--|
| Pre-trained on CC12M   |                                |                                |                                |                                |                                |                                |                                |                                |                                |                                |                                |                                |                                |                                |                                |  |
| CLIP                   | 87.0 $\pm$ 0.5                 | 77.5 $\pm$ 0.6                 | 82.1 $\pm$ 0.7                 | 97.2 $\pm$ 0.2                 | 90.9 $\pm$ 0.5                 | 62.0 $\pm$ 1.0                 | 83.3 $\pm$ 0.6                 | 91.1 $\pm$ 0.5                 | 98.2 $\pm$ 0.2                 | 97.6 $\pm$ 0.2                 | 92.6 $\pm$ 0.4                 | 83.4 $\pm$ 0.5                 | 91.2 $\pm$ 0.4                 | 70.6 $\pm$ 0.8                 | 44.3 $\pm$ 0.7                 |  |
| LaCLIP                 | <b>89.9<math>\pm</math>0.5</b> | <b>81.3<math>\pm</math>0.5</b> | <b>85.0<math>\pm</math>0.6</b> | 98.0 $\pm$ 0.2                 | <b>95.3<math>\pm</math>0.3</b> | 68.1 $\pm$ 1.0                 | <b>84.9<math>\pm</math>0.6</b> | 93.4 $\pm$ 0.4                 | <b>98.9<math>\pm</math>0.2</b> | 98.4 $\pm$ 0.2                 | 95.9 $\pm$ 0.2                 | 83.0 $\pm$ 0.5                 | <b>92.4<math>\pm</math>0.4</b> | 76.4 $\pm$ 0.8                 | <b>46.7<math>\pm</math>0.7</b> |  |
| LaCLIP-MT              | 89.5 $\pm$ 0.5                 | 80.1 $\pm$ 0.5                 | 84.4 $\pm$ 0.6                 | 98.0 $\pm$ 0.2                 | 94.8 $\pm$ 0.4                 | <b>69.6<math>\pm</math>1.0</b> | 84.6 $\pm$ 0.6                 | <b>93.7<math>\pm</math>0.4</b> | 98.8 $\pm$ 0.2                 | 98.4 $\pm$ 0.2                 | <b>96.0<math>\pm</math>0.2</b> | <b>83.8<math>\pm</math>0.5</b> | 92.0 $\pm$ 0.4                 | <b>76.8<math>\pm</math>0.7</b> | 46.4 $\pm$ 0.7                 |  |
| Pre-trained on RedCaps |                                |                                |                                |                                |                                |                                |                                |                                |                                |                                |                                |                                |                                |                                |                                |  |
| CLIP                   | 94.4 $\pm$ 0.3                 | 80.6 $\pm$ 0.5                 | 85.3 $\pm$ 0.6                 | 95.9 $\pm$ 0.3                 | 88.5 $\pm$ 0.6                 | 54.5 $\pm$ 0.9                 | 82.6 $\pm$ 0.6                 | 94.5 $\pm$ 0.4                 | 97.8 $\pm$ 0.2                 | 99.0 $\pm$ 0.1                 | 94.8 $\pm$ 0.3                 | 84.9 $\pm$ 0.5                 | 91.3 $\pm$ 0.4                 | 75.3 $\pm$ 0.8                 | 40.6 $\pm$ 0.7                 |  |
| LaCLIP                 | 95.8 $\pm$ 0.3                 | 81.4 $\pm$ 0.5                 | 85.4 $\pm$ 0.6                 | 96.2 $\pm$ 0.3                 | 90.9 $\pm$ 0.5                 | <b>58.8<math>\pm</math>1.0</b> | 82.4 $\pm$ 0.6                 | 94.1 $\pm$ 0.4                 | 98.0 $\pm$ 0.2                 | 99.2 $\pm$ 0.1                 | <b>95.6<math>\pm</math>0.2</b> | 86.2 $\pm$ 0.5                 | 92.1 $\pm$ 0.4                 | 76.5 $\pm$ 0.8                 | <b>42.6<math>\pm</math>0.7</b> |  |
| LaCLIP-MT              | <b>95.9<math>\pm</math>0.3</b> | <b>81.8<math>\pm</math>0.5</b> | <b>86.0<math>\pm</math>0.6</b> | <b>96.5<math>\pm</math>0.3</b> | <b>91.4<math>\pm</math>0.5</b> | 58.1 $\pm$ 1.0                 | <b>82.7<math>\pm</math>0.6</b> | <b>94.8<math>\pm</math>0.4</b> | <b>98.2<math>\pm</math>0.2</b> | <b>99.3<math>\pm</math>0.1</b> | 95.4 $\pm$ 0.2                 | <b>87.5<math>\pm</math>0.4</b> | <b>92.2<math>\pm</math>0.4</b> | 76.5 $\pm$ 0.8                 | 42.5 $\pm$ 0.7                 |  |

with our LLM-based augmentation demonstrates good scalability with the number of augmentations. This can be attributed to the rich and diverse nature of LLaMA ICL in the rewriting process, allowing for continued performance improvement with more augmentations.

## F. t-SNE visualizations

To gain a deeper understanding of the distinctions between the features learned from LaCLIP and vanilla CLIP, as well as the impact of different augmentation strategies used in LaCLIP training, we visualize the vision encoder features on different downstream datasets using t-SNE [30] in Figure A1. We generate feature visualizations for CIFAR-10, Food101, STL-10, and EuroSAT datasets, as they provide sufficient samples per class for meaningful visualizations. Other datasets have a limited number of samples per class in the test set, making it difficult to generate reliable visualizations. For Food101 we visualize the features from the first 10 classes.

The visualization reveals that LaCLIP trained with our proposed LLM-based rewriting strategy exhibits clearer class boundaries and more distinct clusters compared to other approaches. This observation suggests that language augmentations not only enhance the performance of text encoders, but also improve the ability of vision encoders to learn a more effective image embedding space that is well-suited for downstream tasks.

## G. Detailed Experiment Results for LaCLIP-MT

In Table A9, we present a detailed performance comparison among CLIP, LaCLIP, and the Multi-Text version LaCLIP-MT, as introduced in Section 5.

Table A10: Performance comparison of CLIP and LaCLIP trained with different backbone architectures, ViT-S/16, ViT-B/16 and ViT-L/16, on CC12M.

(a) Zero-shot and Linear-probing Experiment Results

| Backbone Model |        | Food-101    | CIFAR-10    | CIFAR-100   | SUN397      | Cars        | Aircraft    | DTD         | Pets        | Caltech-101 | Flowers     | STL-10      | EuroSAT     | RESISC45    | GTSRB       | Country211  | Average     | ImageNet    |  |
|----------------|--------|-------------|-------------|-------------|-------------|-------------|-------------|-------------|-------------|-------------|-------------|-------------|-------------|-------------|-------------|-------------|-------------|-------------|--|
| Zero-shot      |        |             |             |             |             |             |             |             |             |             |             |             |             |             |             |             |             |             |  |
| ViT-S/16       | CLIP   | 44.0        | 54.7        | 32.6        | 41.9        | 20.2        | 2.5         | 20.1        | 56.9        | 74.0        | 29.3        | 88.0        | 29.1        | 36.0        | 11.2        | 4.4         | 36.3        | 36.9        |  |
|                | LaCLIP | <b>57.6</b> | <b>70.6</b> | <b>37.1</b> | <b>55.6</b> | <b>29.1</b> | <b>6.6</b>  | <b>29.7</b> | <b>71.2</b> | <b>81.1</b> | <b>39.5</b> | <b>93.6</b> | <b>26.7</b> | <b>40.0</b> | <b>14.7</b> | <b>8.4</b>  | <b>44.1</b> | <b>46.3</b> |  |
| ViT-B/16       | CLIP   | 50.8        | 64.9        | 38.5        | 44.7        | 24.1        | 2.4         | 19.4        | 64.1        | 77.4        | 33.2        | 91.0        | 20.1        | 38.9        | 7.3         | 5.1         | 38.8        | 40.2        |  |
|                | LaCLIP | <b>60.7</b> | <b>75.1</b> | <b>43.9</b> | <b>57.0</b> | <b>36.3</b> | <b>5.6</b>  | <b>31.0</b> | <b>72.4</b> | <b>83.3</b> | <b>39.9</b> | <b>95.1</b> | <b>27.3</b> | <b>44.3</b> | <b>12.7</b> | <b>8.9</b>  | <b>46.2</b> | <b>48.4</b> |  |
| ViT-L/16       | CLIP   | 54.1        | 76.0        | 44.3        | 49.7        | 31.2        | 3.4         | 20.9        | 65.8        | 79.9        | 34.7        | 92.6        | <b>30.6</b> | 41.1        | 9.0         | 6.1         | 42.6        | 44.0        |  |
|                | LaCLIP | <b>60.5</b> | <b>80.4</b> | <b>47.3</b> | <b>58.1</b> | <b>38.8</b> | <b>5.7</b>  | <b>31.0</b> | <b>71.5</b> | <b>82.0</b> | <b>39.6</b> | <b>95.8</b> | 18.6        | <b>46.8</b> | <b>13.0</b> | <b>9.2</b>  | <b>46.6</b> | <b>49.1</b> |  |
| Linear-Probing |        |             |             |             |             |             |             |             |             |             |             |             |             |             |             |             |             |             |  |
| ViT-S/16       | CLIP   | 78.9        | 91.7        | 75.3        | 70.5        | 69.1        | 46.5        | <b>74.4</b> | 84.3        | 90.8        | 94.8        | 96.3        | <b>95.9</b> | <b>91.7</b> | 76.5        | 17.9        | 77.0        | 67.1        |  |
|                | LaCLIP | <b>80.3</b> | <b>93.0</b> | <b>76.6</b> | <b>71.8</b> | <b>73.0</b> | <b>49.0</b> | 74.3        | <b>85.3</b> | <b>91.8</b> | <b>95.1</b> | <b>97.0</b> | 95.4        | 90.7        | <b>78.4</b> | <b>18.2</b> | <b>78.0</b> | <b>69.1</b> |  |
| ViT-B/16       | CLIP   | 81.6        | 93.8        | 79.3        | 72.0        | 75.1        | 52.6        | 75.6        | 86.2        | 92.2        | 95.3        | 97.3        | <b>96.7</b> | <b>93.1</b> | 80.6        | 19.7        | 79.4        | 70.3        |  |
|                | LaCLIP | <b>82.9</b> | <b>94.7</b> | <b>79.7</b> | <b>73.8</b> | <b>79.9</b> | <b>54.5</b> | <b>75.7</b> | <b>87.7</b> | <b>93.0</b> | <b>96.4</b> | <b>98.0</b> | 96.4        | 93.0        | <b>81.9</b> | <b>19.7</b> | <b>80.5</b> | <b>72.3</b> |  |
| ViT-L/16       | CLIP   | 83.5        | 95.3        | 81.4        | 73.4        | 80.1        | 57.8        | 76.8        | 88.4        | 93.3        | 96.5        | 97.9        | 97.0        | <b>94.0</b> | 82.9        | <b>20.8</b> | 81.3        | 72.9        |  |
|                | LaCLIP | <b>83.8</b> | <b>95.8</b> | <b>82.8</b> | <b>74.4</b> | <b>81.4</b> | <b>58.1</b> | <b>77.2</b> | <b>88.6</b> | <b>93.9</b> | <b>97.2</b> | <b>98.2</b> | 97.0        | 93.7        | <b>85.2</b> | 20.5        | <b>81.9</b> | <b>73.7</b> |  |

(b) Few-shot Experiment Results

| Backbone Model |        | Food-101                       | CIFAR-10                       | CIFAR-100                      | SUN397                         | Cars                           | Aircraft                       | DTD                            | Pets                           | Caltech-101                    | Flowers                        | STL-10                         | EuroSAT                        | RESISC45                       | GTSRB                          | Country211                     |
|----------------|--------|--------------------------------|--------------------------------|--------------------------------|--------------------------------|--------------------------------|--------------------------------|--------------------------------|--------------------------------|--------------------------------|--------------------------------|--------------------------------|--------------------------------|--------------------------------|--------------------------------|--------------------------------|
| ViT-S/16       | CLIP   | 85.4 $\pm$ 0.6                 | 75.1 $\pm$ 0.6                 | 81.4 $\pm$ 0.7                 | 97.1 $\pm$ 0.3                 | 89.2 $\pm$ 0.5                 | 58.5 $\pm$ 1.0                 | 83.2 $\pm$ 0.6                 | 91.0 $\pm$ 0.5                 | 97.6 $\pm$ 0.3                 | 97.5 $\pm$ 0.2                 | 91.9 $\pm$ 0.4                 | 82.9 $\pm$ 0.5                 | 90.7 $\pm$ 0.5                 | 67.9 $\pm$ 0.8                 | 43.5 $\pm$ 0.7                 |
|                | LaCLIP | <b>88.3<math>\pm</math>0.5</b> | <b>79.4<math>\pm</math>0.6</b> | <b>81.7<math>\pm</math>0.7</b> | <b>97.7<math>\pm</math>0.2</b> | <b>94.0<math>\pm</math>0.4</b> | <b>65.2<math>\pm</math>1.0</b> | <b>84.5<math>\pm</math>0.6</b> | <b>92.4<math>\pm</math>0.5</b> | <b>98.4<math>\pm</math>0.2</b> | <b>98.0<math>\pm</math>0.2</b> | <b>95.5<math>\pm</math>0.3</b> | <b>81.7<math>\pm</math>0.5</b> | <b>91.3<math>\pm</math>0.4</b> | <b>72.2<math>\pm</math>0.8</b> | <b>46.5<math>\pm</math>0.7</b> |
| ViT-B/16       | CLIP   | 87.0 $\pm$ 0.5                 | 77.5 $\pm$ 0.6                 | 82.1 $\pm$ 0.7                 | 97.2 $\pm$ 0.2                 | 90.9 $\pm$ 0.5                 | 62.0 $\pm$ 1.0                 | 83.3 $\pm$ 0.6                 | 91.1 $\pm$ 0.5                 | 98.2 $\pm$ 0.2                 | 97.6 $\pm$ 0.2                 | 92.6 $\pm$ 0.4                 | <b>83.4<math>\pm</math>0.5</b> | 91.2 $\pm$ 0.4                 | 70.6 $\pm$ 0.8                 | 44.3 $\pm$ 0.7                 |
|                | LaCLIP | <b>89.9<math>\pm</math>0.5</b> | <b>81.3<math>\pm</math>0.5</b> | <b>85.0<math>\pm</math>0.6</b> | <b>98.0<math>\pm</math>0.2</b> | <b>95.3<math>\pm</math>0.3</b> | <b>68.1<math>\pm</math>1.0</b> | <b>84.9<math>\pm</math>0.6</b> | <b>93.4<math>\pm</math>0.4</b> | <b>98.9<math>\pm</math>0.2</b> | <b>98.4<math>\pm</math>0.2</b> | <b>95.9<math>\pm</math>0.2</b> | 83.0 $\pm$ 0.5                 | <b>92.4<math>\pm</math>0.4</b> | <b>76.4<math>\pm</math>0.8</b> | <b>46.7<math>\pm</math>0.7</b> |
| ViT-L/16       | CLIP   | 89.1 $\pm$ 0.5                 | 81.1 $\pm$ 0.5                 | 84.8 $\pm$ 0.6                 | 97.8 $\pm$ 0.2                 | 93.0 $\pm$ 0.5                 | 66.4 $\pm$ 1.0                 | 84.3 $\pm$ 0.6                 | 93.2 $\pm$ 0.4                 | 98.7 $\pm$ 0.2                 | 98.2 $\pm$ 0.2                 | 93.4 $\pm$ 0.3                 | 84.6 $\pm$ 0.5                 | 92.2 $\pm$ 0.4                 | 74.1 $\pm$ 0.8                 | 45.2 $\pm$ 0.7                 |
|                | LaCLIP | <b>90.3<math>\pm</math>0.4</b> | <b>84.5<math>\pm</math>0.5</b> | <b>86.4<math>\pm</math>0.6</b> | <b>98.0<math>\pm</math>0.2</b> | <b>95.6<math>\pm</math>0.3</b> | <b>70.5<math>\pm</math>1.0</b> | <b>84.6<math>\pm</math>0.6</b> | <b>94.6<math>\pm</math>0.4</b> | <b>99.1<math>\pm</math>0.1</b> | <b>98.8<math>\pm</math>0.2</b> | <b>96.0<math>\pm</math>0.2</b> | <b>85.0<math>\pm</math>0.5</b> | <b>92.8<math>\pm</math>0.4</b> | <b>78.9<math>\pm</math>0.8</b> | <b>47.2<math>\pm</math>0.7</b> |

The pre-training was performed on CC12M and RedCaps datasets. The results highlight the potential of the multi-text version of the CLIP loss to enhance the performance of LaCLIP even further. By pairing each image with all corresponding texts, the vision encoder receives more diverse supervision during training iterations. The improvements are particularly significant for the RedCaps dataset, where LaCLIP-MT achieves an additional 1.9% increase in zero-shot classification accuracy on ImageNet.

## H. Detailed Experiment Results for Different Backbone

In Table A10, we present the detailed experiment results on CC12M using different backbone architectures, including ViT-S/16, ViT-B/16, and ViT-L/16 encoders. The results consistently demonstrate that our proposed LaCLIP outperforms the vanilla CLIP baseline across all backbone architectures. This highlights the scalability of LaCLIP, as it consistently improves performance on various downstream tasks while leveraging encoders of different sizes.

## I. Ablation on LLaMA model

We performed two ablation studies on the LLaMA model to assess the impact of modifying key components on the performance of LaCLIP. The studies focused on two factors: model size and temperature. By systematically investigating these factors, we aimed to shed light on their influence and provide valuable insights into the effectiveness and adaptability of the LLM-based augmentation approach. All experiments were conducted on LaCLIP using a single text augmentation strategy



Table A11: Ablation study on LaCLIP trained with text rewrites generated with different LLaMA model size on CC12M.

(a) Zero-shot and Linear-probing Experiment Results

| Model Size     | Food-101    | CIFAR-10    | CIFAR-100   | SUN397      | Cars        | Aircraft    | DTD         | Pets        | Caltech-101 | Flowers     | STL-10      | EuroSAT     | RESISC45    | GTSRB       | Country211  | Average     | ImageNet    |
|----------------|-------------|-------------|-------------|-------------|-------------|-------------|-------------|-------------|-------------|-------------|-------------|-------------|-------------|-------------|-------------|-------------|-------------|
| Zero-shot      |             |             |             |             |             |             |             |             |             |             |             |             |             |             |             |             |             |
| N/A (CLIP)     | 50.8        | 64.9        | 38.5        | 44.7        | 24.1        | 2.4         | 19.4        | 64.1        | 77.4        | 33.2        | 91.0        | 20.1        | 38.9        | 7.3         | 5.1         | 38.8        | 40.2        |
| 7B             | 57.0        | 71.1        | 38.9        | 51.2        | <b>31.6</b> | 3.9         | 25.5        | 63.0        | 80.8        | <b>36.9</b> | 92.9        | 24.5        | 39.6        | 10.1        | 6.9         | 42.3        | 44.5        |
| 13B            | 55.4        | 71.5        | <b>39.3</b> | 51.3        | 29.6        | 4.0         | <b>26.4</b> | <b>65.7</b> | 80.7        | 36.0        | 93.8        | 17.0        | 38.7        | 9.0         | <b>7.6</b>  | 41.7        | <b>44.8</b> |
| 33B            | 56.7        | <b>76.0</b> | 37.7        | <b>52.0</b> | 31.2        | <b>4.5</b>  | 24.3        | 60.7        | <b>80.9</b> | 35.4        | <b>94.4</b> | 26.7        | <b>40.4</b> | 11.6        | 7.0         | 42.6        | 44.4        |
| 65B            | <b>57.5</b> | 69.2        | 38.9        | 51.6        | 31.1        | 4.1         | 25.3        | 65.2        | 79.0        | 36.8        | 93.1        | <b>31.7</b> | 40.2        | <b>15.0</b> | 7.4         | <b>43.1</b> | 44.4        |
| Linear-Probing |             |             |             |             |             |             |             |             |             |             |             |             |             |             |             |             |             |
| N/A (CLIP)     | 81.6        | 93.8        | 79.3        | 72.0        | 75.1        | 52.6        | 75.6        | 86.2        | 92.2        | 95.3        | 97.3        | 96.7        | 93.1        | 80.6        | 19.7        | 79.4        | 70.3        |
| 7B             | 81.8        | <b>94.3</b> | <b>79.7</b> | 73.3        | 77.5        | 55.0        | 75.4        | 87.4        | 92.5        | <b>96.3</b> | <b>97.6</b> | <b>96.9</b> | 92.6        | 81.3        | <b>20.2</b> | 80.1        | 71.2        |
| 13B            | 82.1        | 93.7        | 78.2        | 73.0        | 77.6        | <b>55.6</b> | 74.6        | 87.4        | <b>92.7</b> | 96.0        | 97.4        | 96.3        | <b>93.2</b> | 82.5        | 20.0        | 80.0        | 71.2        |
| 33B            | 81.8        | 94.1        | 79.4        | 73.3        | 78.6        | 54.1        | 75.0        | 86.4        | 92.4        | 96.1        | 97.3        | 96.6        | 93.1        | 81.5        | 19.8        | 80.0        | <b>71.4</b> |
| 65B            | <b>82.2</b> | 94.2        | 79.3        | 73.0        | <b>78.7</b> | 54.0        | 75.4        | 87.3        | 91.9        | 95.4        | 97.5        | 96.7        | 92.7        | <b>82.5</b> | 20.0        | 80.1        | 71.3        |

(b) Few-shot Experiment Results

| Model Size | Food-101                       | CIFAR-10                       | CIFAR-100                      | SUN397                         | Cars                           | Aircraft                       | DTD                            | Pets                           | Caltech-101    | Flowers                        | STL-10                         | EuroSAT                        | RESISC45                       | GTSRB                          | Country211                     |
|------------|--------------------------------|--------------------------------|--------------------------------|--------------------------------|--------------------------------|--------------------------------|--------------------------------|--------------------------------|----------------|--------------------------------|--------------------------------|--------------------------------|--------------------------------|--------------------------------|--------------------------------|
| N/A (CLIP) | 87.0 $\pm$ 0.5                 | 77.5 $\pm$ 0.6                 | 82.1 $\pm$ 0.7                 | 97.2 $\pm$ 0.2                 | 90.9 $\pm$ 0.5                 | 62.0 $\pm$ 1.0                 | 83.3 $\pm$ 0.6                 | 91.1 $\pm$ 0.5                 | 98.2 $\pm$ 0.2 | 97.6 $\pm$ 0.2                 | 92.6 $\pm$ 0.4                 | 83.4 $\pm$ 0.5                 | 91.2 $\pm$ 0.4                 | 70.6 $\pm$ 0.8                 | 44.3 $\pm$ 0.7                 |
| 7B         | 88.8 $\pm$ 0.5                 | 78.4 $\pm$ 0.6                 | 83.3 $\pm$ 0.6                 | 97.7 $\pm$ 0.2                 | 93.4 $\pm$ 0.4                 | 66.5 $\pm$ 1.0                 | 84.4 $\pm$ 0.6                 | 92.5 $\pm$ 0.4                 | 98.6 $\pm$ 0.2 | 98.0 $\pm$ 0.2                 | 94.3 $\pm$ 0.3                 | 84.0 $\pm$ 0.5                 | <b>92.3<math>\pm</math>0.4</b> | <b>73.7<math>\pm</math>0.8</b> | 45.6 $\pm$ 0.7                 |
| 13B        | <b>89.1<math>\pm</math>0.5</b> | 79.2 $\pm$ 0.6                 | 82.8 $\pm$ 0.7                 | <b>97.9<math>\pm</math>0.2</b> | 94.0 $\pm$ 0.4                 | 66.3 $\pm$ 1.0                 | 84.1 $\pm$ 0.6                 | 92.9 $\pm$ 0.4                 | 98.5 $\pm$ 0.2 | <b>98.2<math>\pm</math>0.2</b> | 94.4 $\pm$ 0.3                 | 83.2 $\pm$ 0.5                 | 91.6 $\pm$ 0.4                 | 73.6 $\pm$ 0.8                 | 45.7 $\pm$ 0.7                 |
| 33B        | 88.6 $\pm$ 0.5                 | <b>80.3<math>\pm</math>0.6</b> | <b>83.6<math>\pm</math>0.6</b> | 97.8 $\pm$ 0.2                 | <b>94.3<math>\pm</math>0.4</b> | 65.4 $\pm$ 1.0                 | <b>84.7<math>\pm</math>0.6</b> | 92.8 $\pm$ 0.4                 | 98.6 $\pm$ 0.2 | <b>98.2<math>\pm</math>0.2</b> | <b>94.5<math>\pm</math>0.3</b> | 84.2 $\pm$ 0.5                 | 92.1 $\pm$ 0.4                 | 72.0 $\pm$ 0.8                 | <b>45.8<math>\pm</math>0.7</b> |
| 65B        | 88.8 $\pm$ 0.5                 | 79.2 $\pm$ 0.6                 | 82.9 $\pm$ 0.6                 | 97.8 $\pm$ 0.2                 | 94.1 $\pm$ 0.4                 | <b>66.6<math>\pm</math>1.0</b> | 84.3 $\pm$ 0.6                 | <b>93.1<math>\pm</math>0.4</b> | 98.6 $\pm$ 0.2 | 98.1 $\pm$ 0.2                 | <b>94.5<math>\pm</math>0.3</b> | <b>85.6<math>\pm</math>0.5</b> | 91.9 $\pm$ 0.4                 | 72.5 $\pm$ 0.8                 | 45.6 $\pm$ 0.7                 |

with the *ChatGPT* meta-input-output prompting pairs. The models were pre-trained on the CC12M dataset.

**Model Size.** Given that LLaMA offers multiple models with varying numbers of parameters, including 7B, 13B, 33B, and 65B, it is widely acknowledged that larger models tend to excel in NLP tasks involving reasoning and comprehension. Building upon this observation, we sought to explore the potential benefits of incorporating larger LLaMA models into our framework, with the aim of enhancing the performance of LaCLIP on downstream tasks.

To investigate whether the use of larger LLaMA models would yield improved results, we conducted a series of experiments where LaCLIP was trained using text augmented by LLaMA models of different sizes. We compared the performance of LaCLIP across these different configurations and summarized the results in Table A11.

Through our analysis, we have observed that even the smallest and relatively lightweight LLaMA model (7B) is sufficient to significantly boost the performance of LaCLIP on CLIP. Although larger LLaMA models showed some improvement on certain downstream datasets, the overall impact was relatively modest in our experimental setups focused on training vision-language models. It is worth mentioning that different model sizes may benefit from different temperature settings during the sampling process, and we leave this as a topic for future research. In the following sections, we specifically examine the effect of temperature on the 7B model.

**Temperature.** The temperature parameter plays a crucial role in the LLaMA token sampling process as it controls the balance between diversity and precision in the generated text. Higher values of temperature increase text diversity, but excessively high values can introduce random words or non-English tokens, negatively impacting the results.

Table A12: Ablation study on LaCLIP trained with text rewrites generated with different LLaMA temperature on CC12M.

(a) Zero-shot and Linear-probing Experiment Results

| temperature    | Food-101    | CIFAR-10    | CIFAR-100   | SUN397      | Cars        | Aircraft    | DTD         | Pets        | Caltech-101 | Flowers     | STL-10      | EuroSAT     | RESISC45    | GTSRB       | Country211  | Average     | ImageNet    |
|----------------|-------------|-------------|-------------|-------------|-------------|-------------|-------------|-------------|-------------|-------------|-------------|-------------|-------------|-------------|-------------|-------------|-------------|
| Zero-shot      |             |             |             |             |             |             |             |             |             |             |             |             |             |             |             |             |             |
| 0.3            | 52.1        | 66.6        | <b>40.1</b> | 44.0        | 30.0        | 4.0         | 22.3        | 62.2        | 79.7        | 34.8        | 90.7        | 21.3        | 37.3        | 10.9        | 6.3         | 40.2        | 43.6        |
| 0.5            | 54.0        | 69.5        | 36.4        | 46.1        | <b>31.8</b> | 3.4         | 22.9        | 62.3        | 80.2        | 35.8        | 93.0        | 22.4        | 38.1        | 10.9        | 6.1         | 40.9        | 44.0        |
| 0.7            | 53.6        | 67.2        | 37.5        | 48.3        | 31.5        | 3.9         | 24.0        | 63.5        | 78.6        | 34.6        | 91.9        | 24.2        | <b>42.9</b> | 8.1         | 6.7         | 41.1        | 43.8        |
| 0.9            | <b>57.0</b> | 71.1        | 38.9        | 51.2        | 31.6        | 3.9         | <b>25.5</b> | 63.0        | <b>80.8</b> | <b>36.9</b> | 92.9        | <b>24.5</b> | 39.6        | 10.1        | 6.9         | <b>42.3</b> | <b>44.5</b> |
| 1.1            | 55.8        | <b>72.8</b> | 39.2        | <b>53.1</b> | 28.6        | <b>4.2</b>  | 23.6        | <b>64.7</b> | 80.6        | 34.2        | <b>93.1</b> | 21.8        | 37.4        | <b>15.2</b> | <b>7.6</b>  | 42.1        | 44.0        |
| Linear-Probing |             |             |             |             |             |             |             |             |             |             |             |             |             |             |             |             |             |
| 0.3            | <b>82.1</b> | 94.0        | 79.0        | 72.9        | 77.9        | 54.9        | 75.3        | <b>87.6</b> | <b>92.7</b> | 96.2        | 97.5        | 96.7        | 92.8        | <b>81.9</b> | 19.6        | <b>80.1</b> | 71.1        |
| 0.5            | <b>82.1</b> | 94.0        | 79.2        | 72.6        | 78.3        | 53.7        | <b>75.7</b> | 86.8        | 92.0        | 95.9        | 97.5        | 96.6        | <b>93.2</b> | 81.5        | 19.7        | 79.9        | 71.0        |
| 0.7            | 81.9        | <b>94.3</b> | 78.9        | 73.2        | <b>78.7</b> | 54.7        | 75.6        | 86.8        | 92.4        | 96.0        | 97.5        | 96.5        | 92.8        | 80.6        | 19.9        | 80.0        | 71.2        |
| 0.9            | 81.8        | <b>94.3</b> | <b>79.7</b> | 73.3        | 77.5        | <b>55.0</b> | 75.4        | 87.4        | 92.5        | <b>96.3</b> | <b>97.6</b> | <b>96.9</b> | 92.6        | 81.3        | <b>20.2</b> | <b>80.1</b> | 71.2        |
| 1.1            | 81.7        | 94.0        | 78.8        | <b>73.4</b> | 77.2        | 54.0        | 74.3        | 87.0        | 92.2        | 95.7        | <b>97.6</b> | 96.1        | 93.1        | 80.4        | 20.1        | 79.7        | <b>71.3</b> |

(b) Few-shot Experiment Results

| temperature | Food-101              | CIFAR-10              | CIFAR-100             | SUN397                | Cars                  | Aircraft              | DTD                   | Pets                  | Caltech-101           | Flowers        | STL-10                | EuroSAT               | RESISC45              | GTSRB                 | Country211            |
|-------------|-----------------------|-----------------------|-----------------------|-----------------------|-----------------------|-----------------------|-----------------------|-----------------------|-----------------------|----------------|-----------------------|-----------------------|-----------------------|-----------------------|-----------------------|
| 0.3         | 89.1 $\pm$ 0.5        | 77.8 $\pm$ 0.6        | 82.3 $\pm$ 0.7        | 97.6 $\pm$ 0.2        | 93.3 $\pm$ 0.4        | 66.1 $\pm$ 1.0        | 84.3 $\pm$ 0.6        | <b>93.0</b> $\pm$ 0.4 | 98.5 $\pm$ 0.2        | 98.1 $\pm$ 0.2 | 93.6 $\pm$ 0.3        | 83.8 $\pm$ 0.5        | 91.8 $\pm$ 0.4        | 71.9 $\pm$ 0.8        | 45.3 $\pm$ 0.7        |
| 0.5         | 88.6 $\pm$ 0.5        | 77.8 $\pm$ 0.6        | 82.4 $\pm$ 0.7        | 97.6 $\pm$ 0.2        | 93.2 $\pm$ 0.4        | 65.5 $\pm$ 1.0        | 84.1 $\pm$ 0.6        | 92.9 $\pm$ 0.4        | 98.5 $\pm$ 0.2        | 98.1 $\pm$ 0.2 | 93.8 $\pm$ 0.3        | 85.0 $\pm$ 0.5        | 92.0 $\pm$ 0.4        | 71.9 $\pm$ 0.8        | 45.4 $\pm$ 0.7        |
| 0.7         | 88.8 $\pm$ 0.5        | 78.0 $\pm$ 0.6        | 82.2 $\pm$ 0.7        | <b>97.8</b> $\pm$ 0.2 | 93.3 $\pm$ 0.4        | 65.5 $\pm$ 1.0        | 84.1 $\pm$ 0.6        | 92.5 $\pm$ 0.5        | 98.6 $\pm$ 0.2        | 98.1 $\pm$ 0.2 | 93.9 $\pm$ 0.3        | 84.0 $\pm$ 0.5        | 91.8 $\pm$ 0.4        | 72.5 $\pm$ 0.8        | <b>45.7</b> $\pm$ 0.7 |
| 0.9         | <b>88.8</b> $\pm$ 0.5 | <b>78.4</b> $\pm$ 0.6 | <b>83.3</b> $\pm$ 0.6 | 97.7 $\pm$ 0.2        | <b>93.4</b> $\pm$ 0.4 | <b>66.5</b> $\pm$ 1.0 | <b>84.4</b> $\pm$ 0.6 | 92.5 $\pm$ 0.4        | 98.6 $\pm$ 0.2        | 98.0 $\pm$ 0.2 | 94.3 $\pm$ 0.3        | <b>84.0</b> $\pm$ 0.5 | <b>92.3</b> $\pm$ 0.4 | <b>73.7</b> $\pm$ 0.8 | 45.6 $\pm$ 0.7        |
| 1.1         | 88.7 $\pm$ 0.5        | 80.1 $\pm$ 0.5        | 83.6 $\pm$ 0.7        | <b>97.8</b> $\pm$ 0.2 | <b>93.4</b> $\pm$ 0.4 | 64.8 $\pm$ 1.0        | 83.8 $\pm$ 0.6        | 92.5 $\pm$ 0.4        | <b>98.7</b> $\pm$ 0.2 | 98.1 $\pm$ 0.2 | <b>95.2</b> $\pm$ 0.3 | 82.3 $\pm$ 0.5        | 91.4 $\pm$ 0.4        | 70.7 $\pm$ 0.8        | <b>45.7</b> $\pm$ 0.7 |

We conducted experiments with temperature values ranging from 0.3 to 1.1, and the detailed results of employing different temperatures for LLaMA generation are provided in Table A12. The results show that overall the performance is quite robust across temperatures. Generally as the temperature increases, the performance initially improves, reaching a peak around  $\tau = 0.9$ , and then begins to decline. Therefore,  $\tau = 0.9$  appears to be the optimal temperature for text rewriting in the context of text augmentation, and we consistently use this value in all of our experiments.

## J. Broader Impact and Limitations

In this paper, we propose LaCLIP, an approach that leverages LLMs to generate text rewrites and improve CLIP training through language augmentations. While the training process itself does not entail any additional memory or computation overhead compared to vanilla CLIP, the process of generating text rewrites using LLMs can be computationally expensive, requiring significant GPU resources and taking hours for large datasets. This could potentially contribute to a higher carbon footprint. Additionally, the quality of the rewritten text generated by LLaMA is not filtered, which may result in some irrelevant details that do not align well with the corresponding images. This misalignment could impact the transferability of the learned embeddings to downstream tasks.

To address these limitations, future work could focus on developing more efficient methods for generating text rewrites using LLMs, reducing the computational burden without sacrificing performance. Furthermore, techniques for filtering the rewritten texts could be explored, aiming to retain only the most relevant and accurate versions while discarding those with misleading details. This would enable the model to learn a better embedding space that is robust and transferable across different downstream datasets, improving overall performance and alignment between vision and text encoders.

## References

- [1] Lukas Bossard, Matthieu Guillaumin, and Luc Van Gool. Food-101—mining discriminative components with random forests. In *Computer Vision—ECCV 2014: 13th European Conference, Zurich, Switzerland, September 6–12, 2014, Proceedings, Part VI 13*, pages 446–461. Springer, 2014. 2
- [2] Soravit Changpinyo, Piyush Sharma, Nan Ding, and Radu Soricut. Conceptual 12m: Pushing web-scale image-text pre-training to recognize long-tail visual concepts. In *Proceedings of the IEEE/CVF Conference on Computer Vision and Pattern Recognition*, pages 3558–3568, 2021. 1
- [3] Gong Cheng, Junwei Han, and Xiaoqiang Lu. Remote sensing image scene classification: Benchmark and state of the art. *Proceedings of the IEEE*, 105(10):1865–1883, 2017. 2
- [4] Mircea Cimpoi, Subhransu Maji, Iasonas Kokkinos, Sammy Mohamed, and Andrea Vedaldi. Describing textures in the wild. In *Proceedings of the IEEE conference on computer vision and pattern recognition*, pages 3606–3613, 2014. 2
- [5] Adam Coates, Andrew Ng, and Honglak Lee. An analysis of single-layer networks in unsupervised feature learning. In *Proceedings of the fourteenth international conference on artificial intelligence and statistics*, pages 215–223. JMLR Workshop and Conference Proceedings, 2011. 2
- [6] Jia Deng, Wei Dong, Richard Socher, Li-Jia Li, Kai Li, and Li Fei-Fei. Imagenet: A large-scale hierarchical image database. In *2009 IEEE conference on computer vision and pattern recognition*, pages 248–255. Ieee, 2009. 1
- [7] Karan Desai and Justin Johnson. Virtex: Learning visual representations from textual annotations. In *Proceedings of the IEEE/CVF conference on computer vision and pattern recognition*, pages 11162–11173, 2021. 1
- [8] Karan Desai, Gaurav Kaul, Zubin Aysola, and Justin Johnson. Redcaps: Web-curated image-text data created by the people, for the people. *arXiv preprint arXiv:2111.11431*, 2021. 1
- [9] Alexey Dosovitskiy, Lucas Beyer, Alexander Kolesnikov, Dirk Weissenborn, Xiaohua Zhai, Thomas Unterthiner, Mostafa Dehghani, Matthias Minderer, Georg Heigold, Sylvain Gelly, et al. An image is worth 16x16 words: Transformers for image recognition at scale. *arXiv preprint arXiv:2010.11929*, 2020. 1
- [10] Linus Ericsson, Henry Gouk, and Timothy M Hospedales. How well do self-supervised models transfer? In *Proceedings of the IEEE/CVF Conference on Computer Vision and Pattern Recognition*, pages 5414–5423, 2021. 2
- [11] Li Fei-Fei, Robert Fergus, and Pietro Perona. One-shot learning of object categories. *IEEE transactions on pattern analysis and machine intelligence*, 28(4):594–611, 2006. 2
- [12] Priya Goyal, Piotr Dollár, Ross Girshick, Pieter Noordhuis, Lukasz Wesolowski, Aapo Kyrola, Andrew Tulloch, Yangqing Jia, and Kaiming He. Accurate, large minibatch sgd: Training imagenet in 1 hour. *arXiv preprint arXiv:1706.02677*, 2017. 2
- [13] Priya Goyal, Quentin Duval, Jeremy Reizenstein, Matthew Leavitt, Min Xu, Benjamin Lefaudeux, Mannat Singh, Vinicius Reis, Mathilde Caron, Piotr Bojanowski, Armand Joulin, and Ishan Misra. *Visl*. <https://github.com/facebookresearch/visl>, 2021. 1
- [14] Patrick Helber, Benjamin Bischke, Andreas Dengel, and Damian Borth. Eurosat: A novel dataset and deep learning benchmark for land use and land cover classification. *IEEE Journal of Selected Topics in Applied Earth Observations and Remote Sensing*, 12(7):2217–2226, 2019. 2
- [15] Jonathan Krause, Michael Stark, Jia Deng, and Li Fei-Fei. 3d object representations for fine-grained categorization. In *Proceedings of the IEEE international conference on computer vision workshops*, pages 554–561, 2013. 2
- [16] Alex Krizhevsky, Geoffrey Hinton, et al. Learning multiple layers of features from tiny images. 2009. 2
- [17] Ilya Loshchilov and Frank Hutter. Decoupled weight decay regularization. *arXiv preprint arXiv:1711.05101*, 2017. 3
- [18] Subhransu Maji, Esa Rahtu, Juho Kannala, Matthew Blaschko, and Andrea Vedaldi. Fine-grained visual classification of aircraft. *arXiv preprint arXiv:1306.5151*, 2013. 2
- [19] Norman Mu, Alexander Kirillov, David Wagner, and Saining Xie. Slip: Self-supervision meets language-image pre-training. In *Computer Vision—ECCV 2022: 17th European Conference, Tel Aviv, Israel, October 23–27, 2022, Proceedings, Part XXVI*, pages 529–544. Springer, 2022. 1

- [20] Maria-Elena Nilsback and Andrew Zisserman. Automated flower classification over a large number of classes. In *2008 Sixth Indian Conference on Computer Vision, Graphics & Image Processing*, pages 722–729. IEEE, 2008. 2
- [21] Omkar M Parkhi, Andrea Vedaldi, Andrew Zisserman, and CV Jawahar. Cats and dogs. In *2012 IEEE conference on computer vision and pattern recognition*, pages 3498–3505. IEEE, 2012. 2
- [22] Alec Radford, Jong Wook Kim, Chris Hallacy, Aditya Ramesh, Gabriel Goh, Sandhini Agarwal, Girish Sastry, Amanda Askell, Pamela Mishkin, Jack Clark, et al. Learning transferable visual models from natural language supervision. In *International conference on machine learning*, pages 8748–8763. PMLR, 2021. 1, 2
- [23] Christoph Schuhmann, Richard Vencu, Romain Beaumont, Robert Kaczmarczyk, Clayton Mullis, Aarush Katta, Theo Coombes, Jenia Jitsev, and Aran Komatsuzaki. Laion-400m: Open dataset of clip-filtered 400 million image-text pairs. *arXiv preprint arXiv:2111.02114*, 2021. 1
- [24] Rico Sennrich, Barry Haddow, and Alexandra Birch. Improving neural machine translation models with monolingual data. *arXiv preprint arXiv:1511.06709*, 2015. 8, 10
- [25] Piyush Sharma, Nan Ding, Sebastian Goodman, and Radu Soricut. Conceptual captions: A cleaned, hypernymed, image alt-text dataset for automatic image captioning. In *Proceedings of the 56th Annual Meeting of the Association for Computational Linguistics (Volume 1: Long Papers)*, pages 2556–2565, 2018. 1
- [26] Jake Snell, Kevin Swersky, and Richard Zemel. Prototypical networks for few-shot learning. *Advances in neural information processing systems*, 30, 2017. 2
- [27] Johannes Stallkamp, Marc Schlipsing, Jan Salmen, and Christian Igel. The german traffic sign recognition benchmark: a multi-class classification competition. In *The 2011 international joint conference on neural networks*, pages 1453–1460. IEEE, 2011. 2
- [28] Bart Thomee, David A Shamma, Gerald Friedland, Benjamin Elizalde, Karl Ni, Douglas Poland, Damian Borth, and Li-Jia Li. Yfcc100m: The new data in multimedia research. *Communications of the ACM*, 59(2):64–73, 2016. 2
- [29] Hugo Touvron, Matthieu Cord, Matthijs Douze, Francisco Massa, Alexandre Sablayrolles, and Hervé Jégou. Training data-efficient image transformers & distillation through attention. In *International conference on machine learning*, pages 10347–10357. PMLR, 2021. 1
- [30] Laurens Van der Maaten and Geoffrey Hinton. Visualizing data using t-sne. *Journal of machine learning research*, 9(11), 2008. 13
- [31] Jason Wei and Kai Zou. Eda: Easy data augmentation techniques for boosting performance on text classification tasks. *arXiv preprint arXiv:1901.11196*, 2019. 8, 10, 12
- [32] Jianxiong Xiao, James Hays, Krista A Ehinger, Aude Oliva, and Antonio Torralba. Sun database: Large-scale scene recognition from abbey to zoo. In *2010 IEEE computer society conference on computer vision and pattern recognition*, pages 3485–3492. IEEE, 2010. 2
